# Supplementary material
Source: PubMed Central journal article supplement (PMC5938166)

Supplementary Table 1. Demographic, postmortem, and clinical characteristics of human subjects used in this study.

| Healthy Comparison Subjects |       |              |     |                  |                              |     |     |                                  | Subjects with Schizophrenia |                                                     |              |     |                  |                              |     |     |                                           |                       |                  |                        |                         |                             |              |                                |                            |                        |                                |                                 |
|-----------------------------|-------|--------------|-----|------------------|------------------------------|-----|-----|----------------------------------|-----------------------------|-----------------------------------------------------|--------------|-----|------------------|------------------------------|-----|-----|-------------------------------------------|-----------------------|------------------|------------------------|-------------------------|-----------------------------|--------------|--------------------------------|----------------------------|------------------------|--------------------------------|---------------------------------|
| Pair                        | Case  | Sex/<br>Race | Age | PMI <sup>a</sup> | Storage<br>Time <sup>b</sup> | RIN | pH  | Cause of Death                   | Case                        | DSM IV diagnosis                                    | Sex/<br>Race | Age | PMI <sup>a</sup> | Storage<br>Time <sup>b</sup> | RIN | pH  | Cause of Death                            | Cannabis<br>History   | Nicotine<br>ATOD | Antipsychot<br>ic ATOD | Antidepressan<br>t ATOD | Benzodiazepine/<br>VPA ATOD | CPZ (mg)     | Family<br>History <sup>c</sup> | Age at Onset of<br>Illness | History of<br>Marriage | Hollingshead<br>Two Factor ISP | Living<br>Independently<br>ATOD |
| 1                           | 1047* | M/W          | 43  | 13.8             | 134.0                        | 9.0 | 6.6 | ASCVD                            | 1209                        | Schizoaffective disorder                            | M/W          | 35  | 9.1              | 114.7                        | 8.7 | 6.5 | Suicide by<br>diphenhydramine<br>overdose | None                  | N                | Y                      | N                       | N                           | 364          | N                              | 21                         | Y                      | 35                             | Y                               |
| 2                           | 1086* | M/W          | 51  | 24.2             | 128.0                        | 8.1 | 6.8 | ASCVD                            | 10025                       | Disorganized schizophrenia;<br>OAR                  | M/B          | 52  | 27.1             | 107.1                        | 7.8 | 6.7 | ASCVD                                     | Abuse in<br>remission | Y                | N                      | N                       | N                           | None         | N                              | 22                         | N                      | 27                             | N                               |
| 3                           | 1092  | F/B          | 40  | 16.6             | 127.4                        | 8.0 | 6.8 | Mitral Valve Prolapse            | 1178                        | Schizoaffective disorder                            | F/B          | 37  | 18.9             | 118.8                        | 8.4 | 6.1 | Pulmonary embolism                        | None                  | Y                | Y                      | N                       | Y                           | 211          | N                              | 26                         | N                      | 40                             | N                               |
| 4                           | 1336  | M/W          | 65  | 18.4             | 92.3                         | 8.0 | 6.8 | Cardiac Tamponade                | 1173                        | Disorganized schizophrenia;<br>ADR                  | M/W          | 62  | 22.9             | 119.0                        | 7.7 | 6.4 | ASCVD                                     | None                  | Y                | Y                      | N                       | N                           | 421          | N                              | 29                         | Y                      | 16                             | Y                               |
| 5                           | 1122  | M/W          | 55  | 15.4             | 124.1                        | 7.9 | 6.7 | Cardiac Tamponade                | 1105                        | Schizoaffective disorder                            | M/W          | 53  | 7.9              | 126.1                        | 8.9 | 6.2 | ASCVD                                     | None                  | Y                | Y                      | N                       | N                           | 421          | N                              | 48                         | N                      | 24                             | N                               |
| 6                           | 1284  | M/W          | 55  | 6.4              | 103.1                        | 8.7 | 6.8 | ASCVD                            | 1188                        | Undifferentiated schizophrenia;<br>AAR; OAR         | M/W          | 58  | 7.7              | 117.5                        | 8.4 | 6.2 | ASCVD                                     | Abuse in<br>remission | Y                | Y                      | N                       | N                           | 711          | Y                              | 25                         | N                      | 45                             | N                               |
| 7                           | 1191  | M/B          | 59  | 19.4             | 117.0                        | 8.4 | 6.2 | ASCVD                            | 1263                        | Undifferentiated schizophrenia;<br>ADR              | M/W          | 62  | 22.7             | 106.4                        | 8.5 | 7.1 | Accidental<br>asphyxiation                | Use                   | Y                | Y                      | Y                       | N                           | 142          | N                              | 21                         | N                      | 11                             | N                               |
| 8                           | 970   | M/W          | 42  | 25.9             | 145.5                        | 7.2 | 6.4 | ASCVD                            | 1222                        | Undifferentiated schizophrenia;<br>AAC              | M/W          | 32  | 30.8             | 112.6                        | 7.5 | 6.4 | Suicide by combined<br>drug overdose      | Use                   | N                | Y                      | Y                       | N                           | 579          | N                              | 16                         | N                      | 14                             | Y                               |
| 9                           | 1247* | F/W          | 58  | 22.7             | 108.7                        | 8.4 | 6.4 | ASCVD                            | 1240                        | Undifferentiated schizophrenia;<br>ADR              | F/B          | 50  | 22.9             | 109.4                        | 7.7 | 6.3 | ASCVD                                     | None                  | Y                | Y                      | N                       | N                           | 633          | N                              | 25                         | N                      | 32                             | N                               |
| 10                          | 1324* | M/W          | 43  | 22.3             | 95.1                         | 7.3 | 7   | Aortic Dissection                | 10020                       | Paranoid schizophrenia; AAC;<br>OAC                 | M/W          | 38  | 28.8             | 108.8                        | 7.4 | 6.6 | Suicide by salicylate<br>overdose         | None                  | Y                | Y                      | Y                       | Y                           | None         | N                              | 18                         | N                      | 27                             | N                               |
| 11                          | 1099  | F/W          | 24  | 9.1              | 126.7                        | 8.6 | 6.5 | Cardiomyopathy                   | 10023                       | Disorganized schizophrenia                          | F/B          | 25  | 20.1             | 108.0                        | 7.4 | 6.7 | Suicide by drowning                       | None                  | N                | Y                      | N                       | Y                           | 312          | Y                              | 15                         | N                      | 17                             | Y                               |
| 12                          | 1307  | M/W          | 32  | 4.8              | 98.1                         | 7.6 | 6.7 | ASCVD                            | 10024                       | Paranoid schizophrenia                              | M/B          | 37  | 6.0              | 107.5                        | 7.5 | 6.1 | ASCVD                                     | None                  | N                | N                      | N                       | N                           | None         | N                              | 20                         | Y                      | 27                             | N                               |
| 13                          | 1391* | F/W          | 51  | 7.8              | 84.1                         | 7.1 | 6.6 | ASCVD                            | 1189                        | Schizoaffective disorder; AAR                       | F/W          | 47  | 14.4             | 117.2                        | 8.3 | 6.4 | Suicide by combined<br>drug overdose      | None                  | Y                | Y                      | Y                       | Y                           | 421          | N                              | 43                         | N                      | 66                             | Y                               |
| 14                          | 1282* | F/W          | 39  | 24.5             | 102.9                        | 7.5 | 6.8 | ASCVD                            | 1211                        | Schizoaffective disorder                            | F/W          | 41  | 20.1             | 114.4                        | 7.8 | 6.3 | Sudden unexplained<br>death               | Use                   | Y                | Y                      | Y                       | N                           | 606          | N                              | 29                         | Y                      | 30                             | N                               |
| 15                          | 1159  | M/W          | 51  | 16.7             | 120.2                        | 7.6 | 6.5 | ASCVD                            | 1296                        | Undifferentiated schizophrenia                      | M/W          | 48  | 7.8              | 100.5                        | 7.3 | 6.5 | Pneumonia                                 | None                  | Y                | Y                      | Y                       | N                           | 1613         | N                              | 13                         | N                      | 14                             | N                               |
| 16                          | 1326  | M/W          | 58  | 16.4             | 94.8                         | 8.0 | 6.7 | ASCVD                            | 1314                        | Undifferentiated schizophrenia                      | M/W          | 50  | 11.0             | 97.4                         | 7.2 | 6.2 | ASCVD                                     | None                  | N                | Y                      | Y                       | N                           | dose unknown | N                              | 17                         | N                      | 19                             | N                               |
| 17                          | 902   | M/W          | 60  | 23.6             | 159.8                        | 7.7 | 6.7 | ASCVD                            | 1361                        | Schizoaffective disorder; ODC                       | M/W          | 63  | 23.2             | 90.0                         | 7.7 | 6.4 | Cardiomyopathy                            | Use                   | Y                | Y                      | N                       | Y                           | 493          | N                              | 16                         | N                      | 17                             | N                               |
| 18                          | 592   | M/B          | 41  | 22.1             | 210.7                        | 9.0 | 6.7 | ASCVD                            | 533                         | Chronic undifferentiated<br>schizophrenia           | M/W          | 40  | 29.1             | 220.5                        | 8.4 | 6.8 | Accidental<br>asphyxiation                | None                  | U                | Y                      | N                       | N                           | dose unknown | N                              | 25                         | N                      | 20                             | N                               |
| 19                          | 567   | F/W          | 46  | 15.0             | 214.7                        | 8.9 | 6.7 | Mitral valve prolapse            | 537                         | Schizoaffective disorder                            | F/W          | 37  | 14.5             | 219.8                        | 8.6 | 6.7 | Suicide by hanging                        | None                  | U                | N                      | N                       | N                           | None         | N                              | 29                         | Y                      | 20                             | Y                               |
| 20                          | 1322  | M/W          | 62  | 16.5             | 95.2                         | 8.6 | 6.8 | ASCVD                            | 566                         | Chronic undifferentiated<br>schizophrenia; AAR      | M/W          | 63  | 18.3             | 215.9                        | 8.0 | 6.8 | ASCVD                                     | None                  | Y                | Y                      | Y                       | Y                           | None         | N                              | 43                         | Y                      | 16                             | N                               |
| 21                          | 604   | M/W          | 39  | 19.3             | 208.4                        | 8.6 | 7.1 | Hypoplastic coronary<br>artery   | 581                         | Chronic paranoid schizophrenia;<br>ADC; OAC         | M/W          | 46  | 28.1             | 212.9                        | 7.9 | 7.2 | Accidental combined<br>drug overdose      | Use                   | U                | Y                      | N                       | Y                           | dose unknown | Y                              | 16                         | Y                      | 19                             | Y                               |
| 22                          | 546   | F/W          | 37  | 23.5             | 218.7                        | 8.6 | 6.7 | ASCVD                            | 587                         | Chronic undifferentiated<br>schizophrenia; AAR      | F/B          | 38  | 17.8             | 211.5                        | 9.0 | 7.0 | Myocardial<br>hypertrophy                 | Use                   | Y                | Y                      | N                       | Y                           | 162          | N                              | 18                         | N                      | 17                             | N                               |
| 23                          | 551   | M/W          | 61  | 16.4             | 217.5                        | 8.3 | 6.6 | Cardiac tamponade                | 625                         | Chronic disorganized<br>schizophrenia; AAC          | M/B          | 49  | 23.5             | 205.4                        | 7.6 | 7.3 | ASCVD                                     | None                  | Y                | Y                      | Y                       | N                           | 632          | Y                              | 35                         | Y                      | 34                             | N                               |
| 24                          | 681   | M/W          | 51  | 11.6             | 198.4                        | 8.9 | 7.2 | Hypertrophic cardio-<br>myopathy | 640                         | Chronic paranoid schizophrenia                      | M/W          | 49  | 5.2              | 203.5                        | 8.4 | 6.9 | Pulmonary embolism                        | None                  | U                | Y                      | Y                       | N                           | 682          | N                              | 21                         | N                      | 63                             | N                               |
| 25                          | 806   | M/W          | 57  | 24.0             | 176.9                        | 7.8 | 6.9 | Pulmonary embolism               | 665                         | Chronic paranoid schizophrenia;<br>ADC              | M/B          | 59  | 28.1             | 201.0                        | 9.2 | 6.9 | Intestinal hemorrhage                     | None                  | Y                | Y                      | Y                       | N                           | 272          | Y                              | 27                         | N                      | 16                             | Y                               |
| 26                          | 822   | M/B          | 28  | 25.3             | 174.3                        | 8.5 | 7.0 | ASCVD                            | 787                         | Schizoaffective disorder; ODC                       | M/B          | 27  | 19.2             | 180.6                        | 8.4 | 6.7 | Suicide by gun shot                       | Dependence            | N                | Y                      | N                       | N                           | 474          | N                              | 24                         | N                      | 30                             | N                               |
| 27                          | 727   | M/B          | 19  | 7.0              | 191.4                        | 9.2 | 7.2 | Trauma                           | 829                         | Schizoaffective disorder; ADC;<br>OAR               | M/W          | 25  | 5.0              | 172.3                        | 9.3 | 6.8 | Suicide by salicylate<br>overdose         | Abuse in<br>remission | Y                | N                      | N                       | Y                           | None         | Y                              | 20                         | N                      | 22                             | N                               |
| 28                          | 871   | M/W          | 28  | 16.5             | 163.7                        | 8.5 | 7.1 | Trauma                           | 878                         | Disorganized schizophrenia;<br>ADC                  | M/W          | 33  | 10.8             | 162.8                        | 8.9 | 6.7 | Myocardial fibrosis                       | Use                   | Y                | Y                      | Y                       | Y                           | 421          | N                              | 16                         | N                      | 57                             | N                               |
| 29                          | 700   | M/W          | 42  | 26.1             | 195.5                        | 8.7 | 7.0 | ASCVD                            | 539                         | Schizoaffective disorder; ADR                       | M/W          | 50  | 40.5             | 219.6                        | 8.1 | 7.1 | Suicide by combined<br>drug overdose      | None                  | U                | Y                      | Y                       | Y                           | 463          | N                              | 19                         | Y                      | 45                             | Y                               |
| 30                          | 988   | M/W          | 82  | 22.5             | 142.3                        | 8.4 | 6.2 | Trauma                           | 621                         | Chronic undifferentiated<br>schizophrenia           | M/W          | 83  | 16.0             | 205.9                        | 8.7 | 7.3 | Accidental<br>asphyxiation                | None                  | U                | N                      | N                       | N                           | None         | Y                              | 28                         | N                      | 8                              | N                               |
| 31                          | 686*  | F/W          | 52  | 22.6             | 197.5                        | 8.5 | 7.0 | ASCVD                            | 656                         | Schizoaffective disorder; ADC                       | F/B          | 47  | 20.1             | 201.8                        | 9.2 | 7.3 | Suicide by gun shot                       | None                  | Y                | Y                      | N                       | N                           | 316          | Y                              | 17                         | N                      | 19                             | Y                               |
| 32                          | 634   | M/W          | 52  | 16.2             | 204.9                        | 8.5 | 7.0 | ASCVD                            | 722                         | Chronic undifferentiated<br>schizophrenia; ODR; OAR | M/B          | 45  | 9.1              | 192.4                        | 9.2 | 6.7 | Upper GI bleeding                         | Use                   | Y                | Y                      | N                       | N                           | 567          | N                              | 26                         | N                      | 24                             | N                               |
| 33                          | 852   | M/W          | 54  | 8.0              | 167.3                        | 9.1 | 6.8 | Cardiac tamponade                | 781                         | Schizoaffective disorder; ADR                       | M/B          | 52  | 8.0              | 182.3                        | 7.7 | 6.7 | Peritonitis                               | None                  | Y                | Y                      | Y                       | N                           | 256          | N                              | 37                         | Y                      | 24                             | N                               |
| 34                          | 987   | F/W          | 65  | 21.5             | 142.9                        | 9.1 | 6.8 | ASCVD                            | 802                         | Schizoaffective disorder; ADC;<br>ODR               | F/W          | 63  | 29.0             | 178.2                        | 9.2 | 6.4 | Right ventricular<br>dysplasia            | None                  | Y                | Y                      | N                       | Y                           | 1358         | N                              | 20                         | N                      | 42                             | Y                               |
| 35                          | 857   | M/W          | 48  | 16.6             | 166.2                        | 8.9 | 6.7 | ASCVD                            | 930                         | Disorganized schizophrenia;<br>ADR; OAR             | M/W          | 47  | 15.3             | 152.7                        | 8.2 | 6.2 | ASCVD                                     | Abuse                 | Y                | Y                      | N                       | Y                           | 204          | N                              | 19                         | N                      | 17                             | N                               |
| 36                          | 739   | M/W          | 40  | 15.8             | 191.1                        | 8.4 | 6.9 | ASCVD                            | 933                         | Disorganized schizophrenia                          | M/W          | 44  | 8.3              | 152.1                        | 8.1 | 5.9 | Myocarditis                               | None                  | N                | Y                      | Y                       | Y                           | dose unknown | N                              | 22                         | N                      | 27                             | N                               |

<sup>a</sup>PMI, postmortem interval (hours); <sup>b</sup>Storage time (months) at -80C; <sup>c</sup>First degree relative with schizophrenia; Other abbreviations: ASCVD, arteriosclerotic cardiovascular disease; ATOD, at time of death; ADC, alcohol dependence, current at time of death; ADR, alcohol dependence, in remission at time of death; AAC, alcohol abuse, current at time of death; AAR, alcohol abuse, in remission at time of death; ODC, other substance dependence, current at time of death; ODR, other substance dependence, in remission at time of death; OAC, other substance abuse, current at time of death; OAR, other substance abuse, in remission at time of death; U, unknown; VPA, valproic acid; ISP, index of social position. CPZ (mg): Daily antipsychotic medication dose in chlorpromazine equivalent (Andreasen, NC et al. 2010).

\* subjects used in comparison between PV and pyramidal cells

**Supplementary Table 2. Analysis of potential confounding covariates**

| <b><u>Potential confounding covariate</u></b> | <b><u>Number of times appearing with Top 500 DEPs</u></b> |
|-----------------------------------------------|-----------------------------------------------------------|
| RIN                                           | 96                                                        |
| Age                                           | 58                                                        |
| Suicide                                       | 45                                                        |
| Schizoaffective diagnosis                     | 25                                                        |
| Antidepressants ATOD                          | 20                                                        |
| PMI                                           | 19                                                        |
| Benzodiazepine/VPA ATOD                       | 18                                                        |
| Tobacco ATOD                                  | 18                                                        |
| Sex                                           | 8                                                         |

Abbreviations: RIN- RNA integrity number; ATOD- at time of death; PMI- postmortem interval; VPA- valproic acid

**Supplementary Table 3.** Differentially expressed genes in schizophrenia.

**DEGs with increased expression in schizophrenia**

| <b>Symbol</b> | <b>Gene Title</b>                                                   | <b>% change</b> |
|---------------|---------------------------------------------------------------------|-----------------|
| ABCC2         | ATP-binding cassette, sub-family C (CFTR/MRP), member 2             | +16.9           |
| ACKR1         | atypical chemokine receptor 1 (Duffy blood group)                   | +16.9           |
| ACTL8         | actin-like 8                                                        | +10.4           |
| ADAM33        | ADAM metallopeptidase domain 33                                     | +17             |
| ADAM8         | ADAM metallopeptidase domain 8                                      | +17.5           |
| ADAMTS7       | ADAM metallopeptidase with thrombospondin type 1 motif, 7           | +17.4           |
| ADAMTSL1      | ADAMTS-like 1                                                       | +14.1           |
| ADM           | adrenomedullin                                                      | +18.4           |
| AFAP1L1       | actin filament associated protein 1-like 1                          | +16.1           |
| AGER          | advanced glycosylation end product-specific receptor                | +17.3           |
| AGPAT2        | 1-acylglycerol-3-phosphate O-acyltransferase 2                      | +17.8           |
| AGT           | angiotensinogen (serpin peptidase inhibitor, clade A, member 8)     | +60.5           |
| ALPI          | alkaline phosphatase, intestinal                                    | +14.9           |
| ANKDD1A       | ankyrin repeat and death domain containing 1A                       | +17             |
| ANKRD20A5P    | ankyrin repeat domain 20 family, member A5, pseudogene              | +53.8           |
| ANKRD46       | ankyrin repeat domain 46                                            | +16.9           |
| APOBEC3D      | apolipoprotein B mRNA editing enzyme, catalytic polypeptide-like 3D | +15.6           |
| APOBEC3H      | apolipoprotein B mRNA editing enzyme, catalytic polypeptide-like 3H | +15.5           |
| APOC1         | apolipoprotein C-I                                                  | +13.2           |
| <b>APOL1</b>  | apolipoprotein L, 1                                                 | +10.4           |
| APOL4         | apolipoprotein L, 4                                                 | +16             |
| <b>APOL6</b>  | apolipoprotein L, 6                                                 | +17.4           |
| AQP1          | aquaporin 1 (Colton blood group)                                    | +18.2           |
| AQP8          | aquaporin 8                                                         | +14.9           |
| ARHGAP21      | Rho GTPase activating protein 21                                    | +31.2           |
| ARHGEF16      | Rho guanine nucleotide exchange factor (GEF) 16                     | +15             |
| ARL6IP4       | ADP-ribosylation factor-like 6 interacting protein 4                | +16.6           |
| ARSE          | arylsulfatase E (chondrodysplasia punctata 1)                       | +24.4           |
| ARVP6125      | uncharacterized LOC442092                                           | +23.9           |

|                  |                                                                           |       |
|------------------|---------------------------------------------------------------------------|-------|
| ASCL2            | achaete-scute family bHLH transcription factor 2                          | +11.3 |
| ASMTL-AS1        | ASMTL antisense RNA 1                                                     | +12.9 |
| ATG16L2          | autophagy related 16-like 2 ( <i>S. cerevisiae</i> )                      | +22   |
| ATM              | ATM serine/threonine kinase                                               | +59.2 |
| ATP1A2           | ATPase, Na <sup>+</sup> /K <sup>+</sup> transporting, alpha 2 polypeptide | +19.9 |
| ATP2A3           | ATPase, Ca <sup>++</sup> transporting, ubiquitous                         | +11.5 |
| ATP4A            | ATPase, H <sup>+</sup> /K <sup>+</sup> exchanging, alpha polypeptide      | +12.2 |
| ATP9B            | ATPase, class II, type 9B                                                 | +12.3 |
| BAI1             | brain-specific angiogenesis inhibitor 1                                   | +15.8 |
| BAIAP2           | BAI1-associated protein 2                                                 | +20.8 |
| <b>BAIAP3</b>    | BAI1-associated protein 3                                                 | +19.6 |
| BAZ2A            | bromodomain adjacent to zinc finger domain, 2A                            | +19.1 |
| BCL2L11          | BCL2-like 11 (apoptosis facilitator)                                      | +16.4 |
| BCL3             | B-cell CLL/lymphoma 3 /// microRNA 8085                                   | +22.5 |
| BGN              | biglycan                                                                  | +41.1 |
| BIRC5            | baculoviral IAP repeat containing 5                                       | +17.8 |
| <b>BIRC7</b>     | baculoviral IAP repeat containing 7                                       | +17.3 |
| <b>BMF</b>       | Bcl2 modifying factor                                                     | +24.1 |
| BPIFB3           | BPI fold containing family B, member 3                                    | +10.1 |
| BRD7P3           | bromodomain containing 7 pseudogene 3                                     | +36.2 |
| BRF1             | BRF1, RNA polymerase III transcription initiation factor 90 kDa subunit   | +15.7 |
| BRICD5           | BRICHOS domain containing 5                                               | +17.5 |
| BTN2A3P          | butyrophilin, subfamily 2, member A3, pseudogene                          | +15.9 |
| C10orf95         | chromosome 10 open reading frame 95                                       | +14.3 |
| C12orf43         | chromosome 12 open reading frame 43                                       | +17.7 |
| <b>C14orf180</b> | chromosome 14 open reading frame 180                                      | +19.6 |
| C14orf80         | chromosome 14 open reading frame 80                                       | +14.1 |
| C15orf40         | chromosome 15 open reading frame 40                                       | +19.2 |
| C17orf74         | chromosome 17 open reading frame 74                                       | +13.8 |
| C19orf71         | chromosome 19 open reading frame 71                                       | +12.2 |
| C20orf27         | chromosome 20 open reading frame 27                                       | +18.8 |
| C5orf38          | chromosome 5 open reading frame 38                                        | +11.2 |
| C8orf86          | chromosome 8 open reading frame 86                                        | +24   |

|                 |                                                            |       |
|-----------------|------------------------------------------------------------|-------|
| C9orf139        | chromosome 9 open reading frame 139                        | +15.3 |
| C9orf163        | chromosome 9 open reading frame 163                        | +15.4 |
| C9orf3          | chromosome 9 open reading frame 3                          | +62.9 |
| CA6             | carbonic anhydrase VI                                      | +12.4 |
| CACFD1          | calcium channel flower domain containing 1                 | +16.2 |
| CACNG6          | calcium channel, voltage-dependent, gamma subunit 6        | +13.2 |
| CACUL1          | CDK2-associated, cullin domain 1                           | +14.6 |
| CALCOCO2        | calcium binding and coiled-coil domain 2                   | +36.2 |
| CCDC42B         | coiled-coil domain containing 42B                          | +15.4 |
| CCDC64          | coiled-coil domain containing 64                           | +15.4 |
| CCDC7           | coiled-coil domain containing 7                            | +15.4 |
| CCDC71L         | coiled-coil domain containing 71-like                      | +16.1 |
| CCDC78          | coiled-coil domain containing 78                           | +16.1 |
| CCL27           | chemokine (C-C motif) ligand 27                            | +12.3 |
| CD164L2         | CD164 sialomucin-like 2                                    | +17.8 |
| CD177           | CD177 molecule                                             | +15.9 |
| CD1C            | CD1c molecule                                              | +13.7 |
| CD209           | CD209 molecule                                             | +14.1 |
| CD248           | CD248 molecule, endosialin                                 | +19.7 |
| CD300LG         | CD300 molecule-like family member g                        | +13.7 |
| CD79B           | CD79b molecule, immunoglobulin-associated beta             | +17.6 |
| CDC45           | cell division cycle 45                                     | +9.7  |
| CDCA4           | cell division cycle associated 4                           | +15.1 |
| CDHR4           | cadherin-related family member 4                           | +19   |
| CDK10           | cyclin-dependent kinase 10                                 | +19   |
| CDKN3           | cyclin-dependent kinase inhibitor 3                        | +17.3 |
| <b>CDRT15P1</b> | CMT1A duplicated region transcript 15 pseudogene 1         | +18.5 |
| <b>CEACAM21</b> | carcinoembryonic antigen-related cell adhesion molecule 21 | +13   |
| CELA2A          | chymotrypsin-like elastase family, member 2A               | +14.2 |
| CELA3A          | chymotrypsin-like elastase family, member 3A               | +16   |
| CHP2            | calcineurin-like EF-hand protein 2                         | +10.1 |
| CHPF            | chondroitin polymerizing factor                            | +16.8 |
| CHRND           | cholinergic receptor, nicotinic, delta (muscle)            | +15.6 |

|                |                                                           |       |
|----------------|-----------------------------------------------------------|-------|
| CHST7          | carbohydrate (N-acetylglucosamine 6-O) sulfotransferase 7 | +29.5 |
| CLCF1          | cardiotrophin-like cytokine factor 1                      | +23.3 |
| CLCN7          | chloride channel, voltage-sensitive 7                     | +16.6 |
| CLDN11         | claudin 11                                                | +14.5 |
| CLDN19         | claudin 19                                                | +14.6 |
| CLDN9          | claudin 9                                                 | +21.4 |
| <b>CLEC4M</b>  | C-type lectin domain family 4, member M                   | +15.7 |
| CLK3           | CDC-like kinase 3                                         | +17.7 |
| <b>CMTM5</b>   | CKLF-like MARVEL transmembrane domain containing 5        | +14.3 |
| COL16A1        | collagen, type XVI, alpha 1                               | +17.1 |
| COL1A1         | collagen, type I, alpha 1                                 | +12   |
| COL4A6         | collagen, type IV, alpha 6                                | +19.9 |
| COMP           | cartilage oligomeric matrix protein                       | +13.3 |
| COPE           | coatamer protein complex, subunit epsilon                 | +12.8 |
| COX6B2         | cytochrome c oxidase subunit VIb polypeptide 2 (testis)   | +12.4 |
| CREB3L3        | cAMP responsive element binding protein 3-like 3          | +11.8 |
| CRIPT          | cysteine-rich PDZ-binding protein                         | +66.7 |
| CSF3           | colony stimulating factor 3 (granulocyte)                 | +20.8 |
| CTNNAL1        | catenin (cadherin-associated protein), alpha-like 1       | +30.9 |
| CYP1A2         | cytochrome P450, family 1, subfamily A, polypeptide 2     | +21.6 |
| CYTH4          | cytohesin 4                                               | +10.7 |
| DAB1           | Dab, reelin signal transducer, homolog 1 (Drosophila)     | +36.8 |
| DACT1          | dishevelled-binding antagonist of beta-catenin 1          | +15   |
| DAPK1          | death-associated protein kinase 1                         | +21.3 |
| DMKN           | dermokine                                                 | +17.7 |
| DNAH5          | dynein, axonemal, heavy chain 5                           | +12.9 |
| <b>DNAJB13</b> | DnaJ (Hsp40) homolog, subfamily B, member 13              | +16.9 |
| DND1           | DND microRNA-mediated repression inhibitor 1              | +30.4 |
| DPP9           | dipeptidyl-peptidase 9                                    | +16   |
| DUSP9          | dual specificity phosphatase 9                            | +13.4 |
| EBF3           | early B-cell factor 3                                     | +17.6 |
| ECE1           | endothelin converting enzyme 1                            | +15   |
| EEF1A1         | eukaryotic translation elongation factor 1 alpha 1        | +10.5 |

|               |                                                                                      |       |
|---------------|--------------------------------------------------------------------------------------|-------|
| EEF2K         | eukaryotic elongation factor-2 kinase /// eukaryotic elongation factor 2 kinase-like | +38.8 |
| EIF5A         | eukaryotic translation initiation factor 5A                                          | +13.3 |
| ELAC1         | elaC ribonuclease Z 1                                                                | +19.8 |
| <b>EPS8L2</b> | EPS8-like 2                                                                          | +17.1 |
| ERN2          | endoplasmic reticulum to nucleus signaling 2                                         | +14.3 |
| EVC           | Ellis van Creveld syndrome                                                           | +11.2 |
| EVI5          | ecotropic viral integration site 5                                                   | +18.2 |
| EVX1          | even-skipped homeobox 1                                                              | +12.4 |
| EXD1          | exonuclease 3'-5' domain containing 1                                                | +17.3 |
| EXOC3L2       | exocyst complex component 3-like 2                                                   | +17.4 |
| F2            | coagulation factor II (thrombin)                                                     | +16.2 |
| F2RL3         | coagulation factor II (thrombin) receptor-like 3                                     | +16.5 |
| FAM107A       | family with sequence similarity 107, member A                                        | +44.2 |
| FAM109A       | family with sequence similarity 109, member A                                        | +20.5 |
| FAM124A       | family with sequence similarity 124A                                                 | +15.2 |
| FAM132A       | family with sequence similarity 132, member A                                        | +15.6 |
| FAM170A       | family with sequence similarity 170, member A                                        | +18.4 |
| FAM221B       | family with sequence similarity 221, member B                                        | +13.1 |
| FAM83A-AS1    | FAM83A antisense RNA 1                                                               | +12.3 |
| FAM83C        | family with sequence similarity 83, member C                                         | +13   |
| FAXDC2        | fatty acid hydroxylase domain containing 2                                           | +11.7 |
| FBF1          | Fas (TNFRSF6) binding factor 1                                                       | +19.5 |
| FBLIM1        | filamin binding LIM protein 1                                                        | +15.1 |
| FBLN1         | fibulin 1                                                                            | +17.8 |
| FBXO2         | F-box protein 2                                                                      | +17.4 |
| FBXO24        | F-box protein 24                                                                     | +17.1 |
| FBXW8         | F-box and WD repeat domain containing 8                                              | +14.7 |
| FCER1A        | Fc fragment of IgE, high affinity I, receptor for; alpha polypeptide                 | +10.6 |
| FCN2          | ficolin (collagen/fibrinogen domain containing lectin) 2                             | +13.6 |
| <b>FCRL6</b>  | Fc receptor-like 6                                                                   | +21.1 |
| FCRLA         | Fc receptor-like A                                                                   | +14   |
| FGB           | fibrinogen beta chain                                                                | +15.1 |
| <b>FGD3</b>   | FYVE, RhoGEF and PH domain containing 3                                              | +11.2 |

|               |                                                                                         |       |
|---------------|-----------------------------------------------------------------------------------------|-------|
| FGFR4         | fibroblast growth factor receptor 4                                                     | +15.4 |
| <b>FGFRL1</b> | fibroblast growth factor receptor-like 1                                                | +23.2 |
| FHAD1         | forkhead-associated (FHA) phosphopeptide binding domain 1                               | +16.5 |
| FKBP1AP1      | FK506 binding protein 1A, 12kDa pseudogene 1                                            | +28.8 |
| FLT4          | fms-related tyrosine kinase 4                                                           | +13.2 |
| FLYWCH1       | FLYWCH-type zinc finger 1                                                               | +24.1 |
| FSCN3         | fascin actin-bundling protein 3, testicular                                             | +18.3 |
| FTCD          | formimidoyltransferase cyclodeaminase                                                   | +12.8 |
| FXYD5         | FXYD domain containing ion transport regulator 5                                        | +19.4 |
| FZD5          | frizzled class receptor 5                                                               | +12.3 |
| GALK1         | galactokinase 1                                                                         | +18.7 |
| GALM          | galactose mutarotase (aldose 1-epimerase)                                               | +34   |
| GALNT6        | polypeptide N-acetylgalactosaminyltransferase 6                                         | +10.8 |
| GATA1         | GATA binding protein 1 (globin transcription factor 1)                                  | +15   |
| GATA2         | GATA binding protein 2                                                                  | +12.4 |
| GDF5          | growth differentiation factor 5                                                         | +14.3 |
| GGA3          | golgi-associated, gamma adaptin ear containing, ARF binding protein 3                   | +20.8 |
| GGT6          | gamma-glutamyltransferase 6                                                             | +12.1 |
| <b>GLUL</b>   | glutamate-ammonia ligase                                                                | +28.4 |
| GLYCK         | glycerate kinase                                                                        | +19.9 |
| GMIP          | GEM interacting protein                                                                 | +22.5 |
| GNAO1         | guanine nucleotide binding protein (G protein), alpha activating activity polypeptide O | +27.1 |
| GOLGA2P10     | golgin A2 pseudogene                                                                    | +49.3 |
| GPATCH3       | G patch domain containing 3                                                             | +11.5 |
| GPC6          | glypican 6                                                                              | +13   |
| GPD1          | glycerol-3-phosphate dehydrogenase 1 (soluble)                                          | +14   |
| <b>GPER1</b>  | G protein-coupled estrogen receptor 1                                                   | +18.6 |
| GPR114        | G protein-coupled receptor 114                                                          | +14.1 |
| GPR142        | G protein-coupled receptor 142                                                          | +13.2 |
| GPR35         | G protein-coupled receptor 35                                                           | +14.5 |
| GPR56         | G protein-coupled receptor 56                                                           | +80   |
| GPR6          | G protein-coupled receptor 6                                                            | +16   |
| GRAMD2        | GRAM domain containing 2                                                                | +10.1 |



|              |                                                                                                                                                   |       |
|--------------|---------------------------------------------------------------------------------------------------------------------------------------------------|-------|
| GRM4         | glutamate receptor, metabotropic 4                                                                                                                | +19.7 |
| GSDMD        | gasdermin D                                                                                                                                       | +15.6 |
| GSG1L        | GSG1-like                                                                                                                                         | +15.9 |
| H1FOO        | H1 histone family, member O, oocyte-specific                                                                                                      | +12.3 |
| HAAO         | 3-hydroxyanthranilate 3,4-dioxygenase                                                                                                             | +15.7 |
| <b>HAGHL</b> | hydroxyacylglutathione hydrolase-like                                                                                                             | +15.1 |
| HDAC10       | histone deacetylase 10                                                                                                                            | +14.7 |
| HDAC11       | histone deacetylase 11                                                                                                                            | +19.7 |
| HDAC7        | histone deacetylase 7                                                                                                                             | +22.5 |
| HDGFL1       | hepatoma derived growth factor-like 1                                                                                                             | +15.1 |
| HEG1         | heart development protein with EGF-like domains 1                                                                                                 | +12.6 |
| HIP1         | huntingtin interacting protein 1                                                                                                                  | +15.8 |
| HIST3H2BB    | histone cluster 3, H2bb                                                                                                                           | +15.5 |
| HIVEP3       | human immunodeficiency virus type I enhancer binding protein 3                                                                                    | +14.2 |
| HLA-DPB1     | major histocompatibility complex, class II, DP beta 1                                                                                             | +15   |
| HMCN2        | hemicentin 2                                                                                                                                      | +14.3 |
| HMGA2        | high mobility group AT-hook 2                                                                                                                     | +13.1 |
| HMHB1        | histocompatibility (minor) HB-1                                                                                                                   | +17.8 |
| HNRNPLL      | heterogeneous nuclear ribonucleoprotein L-like                                                                                                    | +49.7 |
| HNRNPM       | heterogeneous nuclear ribonucleoprotein M                                                                                                         | +13.4 |
| <b>HP</b>    | haptoglobin                                                                                                                                       | +18.4 |
| HPCAL4       | hippocalcin like 4                                                                                                                                | +27.6 |
| HRCT1        | histidine rich carboxyl terminus 1                                                                                                                | +26.4 |
| HSPB7        | heat shock 27kDa protein family, member 7 (cardiovascular)                                                                                        | +19.4 |
| HTR3A        | 5-hydroxytryptamine (serotonin) receptor 3A, ionotropic                                                                                           | +13.4 |
| HYAL1        | hyaluronoglucosaminidase 1                                                                                                                        | +21.2 |
| ID3          | inhibitor of DNA binding 3, dominant negative helix-loop-helix protein                                                                            | +15.7 |
| IFI44L       | interferon-induced protein 44-like                                                                                                                | +16.1 |
| IFITM2       | interferon induced transmembrane protein 2                                                                                                        | +18.2 |
| IFITM3       | interferon induced transmembrane protein 3                                                                                                        | +28.6 |
| IGFBP5       | insulin-like growth factor binding protein 5                                                                                                      | +13.9 |
| IGKC         | immunoglobulin kappa constant /// immunoglobulin kappa variable 1-39 (gene/pseudogene) /// --- ///<br>immunoglobulin kappa variable 1D-39 /// --- | +41.3 |

|                   |                                                                      |       |
|-------------------|----------------------------------------------------------------------|-------|
| IGLJ3             | immunoglobulin lambda joining 3                                      | +19.1 |
| IL15RA            | interleukin 15 receptor, alpha                                       | +14.9 |
| IL17RC            | interleukin 17 receptor C                                            | +18.4 |
| IL17RE            | interleukin 17 receptor E                                            | +16   |
| IL3RA             | interleukin 3 receptor, alpha (low affinity)                         | +18.6 |
| ING4              | inhibitor of growth family, member 4                                 | +13.7 |
| INPP5D            | inositol polyphosphate-5-phosphatase, 145kDa                         | +15.7 |
| IRF5              | interferon regulatory factor 5                                       | +11.7 |
| ISLR              | immunoglobulin superfamily containing leucine-rich repeat            | +14.8 |
| ITGB3             | integrin, beta 3 (platelet glycoprotein IIIa, antigen CD61)          | +15.3 |
| <b>ITGB4</b>      | integrin, beta 4                                                     | +17.5 |
| JPH2              | junctional protein 2                                                 | +13.6 |
| KAZN              | kazrin, periplakin interacting protein                               | +21.4 |
| KCNK10            | potassium channel, subfamily K, member 10                            | +37.6 |
| KCP               | kielin/chordin-like protein                                          | +14.7 |
| KIF25-AS1         | KIF25 antisense RNA 1                                                | +19.5 |
| KLF16             | Kruppel-like factor 16                                               | +12.4 |
| KLK2              | kallikrein-related peptidase 2                                       | +15.3 |
| KLK3              | kallikrein-related peptidase 3                                       | +18.3 |
| KLKB1             | kallikrein B, plasma (Fletcher factor) 1                             | +59   |
| KLRG2             | killer cell lectin-like receptor subfamily G, member 2               | +12.8 |
| KREMEN1           | kringle containing transmembrane protein 1                           | +15   |
| <b>KREMEN2</b>    | kringle containing transmembrane protein 2                           | +17.1 |
| KRT16P1           | keratin 16 pseudogene 1                                              | +13.9 |
| <b>KRTAP10-10</b> | keratin associated protein 10-10                                     | +18.5 |
| KRTAP10-11        | keratin associated protein 10-11                                     | +21.7 |
| KRTAP10-12        | keratin associated protein 10-12 /// keratin associated protein 10-7 | +16   |
| KRTAP10-5         | keratin associated protein 10-5                                      | +23.2 |
| KRTAP10-8         | keratin associated protein 10-8                                      | +19.1 |
| KRTAP23-1         | keratin associated protein 23-1                                      | +15.5 |
| LAMB4             | laminin, beta 4                                                      | +14.3 |
| LAX1              | lymphocyte transmembrane adaptor 1                                   | +10.9 |
| LDLRAD2           | low density lipoprotein receptor class A domain containing 2         | +27.2 |

|              |                                                                                        |       |
|--------------|----------------------------------------------------------------------------------------|-------|
| LEMD1        | LEM domain containing 1                                                                | +15.4 |
| LENEP        | lens epithelial protein                                                                | +14.7 |
| LFNG         | LFNG O-fucosylpeptide 3-beta-N-acetylglucosaminyltransferase                           | +10.9 |
| LGALS9       | lectin, galactoside-binding, soluble, 9                                                | +16.2 |
| LINC01000    | long intergenic non-protein coding RNA 1000                                            | +19.4 |
| LLGL1        | lethal giant larvae homolog 1 (Drosophila)                                             | +14.7 |
| LOC100130071 | GSQS6193                                                                               | +12.2 |
| LOC100131826 | TSSP3028                                                                               | +44.5 |
| LOC100133106 | VCEW9374                                                                               | +16.3 |
| LOC100506766 | uncharacterized LOC100506766                                                           | +11.9 |
| LPCAT3       | lysophosphatidylcholine acyltransferase 3                                              | +17.9 |
| LRBA         | LPS-responsive vesicle trafficking, beach and anchor containing                        | +15.7 |
| LRCH4        | leucine-rich repeats and calponin homology (CH) domain containing 4                    | +22.4 |
| LRG1         | leucine-rich alpha-2-glycoprotein 1                                                    | +18.3 |
| LSMEM2       | leucine-rich single-pass membrane protein 2                                            | +15.1 |
| <b>LST1</b>  | leukocyte specific transcript 1                                                        | +16.9 |
| MADCAM1      | mucosal vascular addressin cell adhesion molecule 1                                    | +18.8 |
| MAFG         | v-maf avian musculoaponeurotic fibrosarcoma oncogene homolog G                         | +23.3 |
| MAMSTR       | MEF2 activating motif and SAP domain containing transcriptional regulator              | +22   |
| MAP3K2       | mitogen-activated protein kinase kinase kinase 2                                       | +53.8 |
| <b>MAVS</b>  | mitochondrial antiviral signaling protein                                              | +17.1 |
| MBD1         | methyl-CpG binding domain protein 1                                                    | +18.4 |
| MBD3         | methyl-CpG binding domain protein 3                                                    | +16.4 |
| MBD3L5       | methyl-CpG binding domain protein 3-like 5                                             | +18.3 |
| MCAT         | malonyl CoA:ACP acyltransferase (mitochondrial)                                        | +11.2 |
| MGAT4A       | mannosyl (alpha-1,3-)-glycoprotein beta-1,4-N-acetylglucosaminyltransferase, isozyme A | +96.7 |
| MICB         | MHC class I polypeptide-related sequence B                                             | +12.7 |
| MKNK1        | MAP kinase interacting serine/threonine kinase 1                                       | +14.8 |
| MLC1         | megalencephalic leukoencephalopathy with subcortical cysts 1                           | +26.2 |
| MRC2         | mannose receptor, C type 2                                                             | +16.7 |
| MRGPRE       | MAS-related GPR, member E                                                              | +18.6 |
| <b>MT2A</b>  | metallothionein 2A                                                                     | +112  |
| MT4          | metallothionein 4                                                                      | +17.2 |

|          |                                                      |       |
|----------|------------------------------------------------------|-------|
| MUC5B    | mucin 5B, oligomeric mucus/gel-forming               | +14.2 |
| MXD3     | MAX dimerization protein 3                           | +18.8 |
| MXRA8    | matrix-remodelling associated 8                      | +13.9 |
| MYL10    | myosin, light chain 10, regulatory                   | +13.5 |
| MYO7B    | myosin VIIB                                          | +17.8 |
| MYOCD    | myocardin                                            | +12.5 |
| MZF1     | myeloid zinc finger 1                                | +17.6 |
| NAALADL1 | N-acetylated alpha-linked acidic dipeptidase-like 1  | +18.2 |
| NAGS     | N-acetylglutamate synthase                           | +15   |
| NARFL    | nuclear prelamin A recognition factor-like           | +18.2 |
| NAV1     | neuron navigator 1                                   | +32.3 |
| NCAPH2   | non-SMC condensin II complex, subunit H2             | +17.6 |
| NCR3     | natural cytotoxicity triggering receptor 3           | +13.1 |
| NECAP2   | NECAP endocytosis associated 2                       | +14.9 |
| NET1     | neuroepithelial cell transforming 1                  | +14.6 |
| NGFR     | nerve growth factor receptor                         | +16.8 |
| NINJ2    | ninjurin 2                                           | +24.7 |
| NLRP1    | NLR family, pyrin domain containing 1                | +14.9 |
| NLRP9    | NLR family, pyrin domain containing 9                | +11.5 |
| NLRX1    | NLR family member X1                                 | +13.1 |
| NMUR1    | neuromedin U receptor 1                              | +17.1 |
| NOL6     | nucleolar protein 6 (RNA-associated)                 | +18.4 |
| NOV      | nephroblastoma overexpressed                         | +40.9 |
| NUP214   | nucleoporin 214kDa                                   | +11.7 |
| NVL      | nuclear VCP-like                                     | +33.4 |
| NXN      | nucleoredoxin                                        | +14.7 |
| NYX      | nyctalopin                                           | +16.3 |
| OIT3     | oncoprotein induced transcript 3                     | +15.7 |
| OPN4     | opsin 4                                              | +15.8 |
| OR10W1   | olfactory receptor, family 10, subfamily W, member 1 | +13.9 |
| OR2A14   | olfactory receptor, family 2, subfamily A, member 14 | +18.9 |
| OSBPL5   | oxysterol binding protein-like 5                     | +14.4 |
| OXER1    | oxoeicosanoid (OXE) receptor 1                       | +12.9 |

|                |                                                                                   |       |
|----------------|-----------------------------------------------------------------------------------|-------|
| P2RY14         | purinergic receptor P2Y, G-protein coupled, 14                                    | +40.6 |
| P2RY6          | pyrimidinergic receptor P2Y, G-protein coupled, 6                                 | +11.1 |
| PADI4          | peptidyl arginine deiminase, type IV                                              | +14.5 |
| PARVG          | parvin, gamma                                                                     | +13.5 |
| <b>PAX4</b>    | paired box 4                                                                      | +21.5 |
| PAX8           | paired box 8                                                                      | +13.8 |
| PCDHA12        | protocadherin alpha 12                                                            | +10.5 |
| PDCD1          | programmed cell death 1                                                           | +15.9 |
| PDCD1LG2       | programmed cell death 1 ligand 2                                                  | +14.3 |
| PDE6G          | phosphodiesterase 6G, cGMP-specific, rod, gamma                                   | +18.6 |
| PDGFRB         | platelet-derived growth factor receptor, beta polypeptide                         | +12.5 |
| PHYKPL         | 5-phosphohydroxy-L-lysine phospho-lyase                                           | +22.3 |
| PIGP           | phosphatidylinositol glycan anchor biosynthesis, class P                          | +37.5 |
| PLA2G15        | phospholipase A2, group XV                                                        | +16.7 |
| PLA2G2D        | phospholipase A2, group IID                                                       | +14.5 |
| PLA2G4C        | phospholipase A2, group IVC (cytosolic, calcium-independent)                      | +37.2 |
| PLAT           | plasminogen activator, tissue                                                     | +7.8  |
| PLEKHG2        | pleckstrin homology domain containing, family G (with RhoGef domain) member 2     | +15.8 |
| <b>PLEKHN1</b> | pleckstrin homology domain containing, family N member 1                          | +15.9 |
| PLK3           | polo-like kinase 3                                                                | +21.2 |
| PNMA5          | paraneoplastic Ma antigen family member 5                                         | +30.8 |
| <b>PODN</b>    | podocan                                                                           | +18.1 |
| PODNL1         | podocan-like 1                                                                    | +18.5 |
| POLA2          | polymerase (DNA directed), alpha 2, accessory subunit                             | +13   |
| PPP4C          | protein phosphatase 4, catalytic subunit                                          | +31.5 |
| PRAMEF1        | PRAME family member 1                                                             | +17.2 |
| PRB2           | proline-rich protein BstNI subfamily 2                                            | +12.3 |
| PRF1           | perforin 1 (pore forming protein)                                                 | +21.9 |
| PRKAG3         | protein kinase, AMP-activated, gamma 3 non-catalytic subunit                      | +15   |
| PRND           | prion protein 2 (dublet)                                                          | +10.6 |
| PRODH          | proline dehydrogenase 1, mitochondrial-like /// proline dehydrogenase (oxidase) 1 | +16.2 |
| PROSER3        | proline and serine rich 3                                                         | +31.5 |
| PROZ           | protein Z, vitamin K-dependent plasma glycoprotein                                | +16.6 |

|              |                                                                     |       |
|--------------|---------------------------------------------------------------------|-------|
| PRR25        | proline rich 25                                                     | +19.3 |
| PRSS1        | protease, serine, 1 (trypsin 1) /// protease, serine, 2 (trypsin 2) | +16.4 |
| PRSS8        | protease, serine, 8                                                 | +18.7 |
| PRUNE        | prune exopolyphosphatase                                            | +25   |
| PSMB5        | proteasome (prosome, macropain) subunit, beta type, 5               | +14   |
| PSTPIP1      | proline-serine-threonine phosphatase interacting protein 1          | +17.1 |
| PTCHD1       | patched domain containing 1                                         | +8    |
| PTGES        | prostaglandin E synthase                                            | +16.7 |
| PTGIS        | prostaglandin I2 (prostacyclin) synthase                            | +14.7 |
| PTH2         | parathyroid hormone 2                                               | +13.1 |
| PTK6         | protein tyrosine kinase 6                                           | +13.9 |
| PTPN6        | protein tyrosine phosphatase, non-receptor type 6                   | +15.2 |
| PTPRG        | protein tyrosine phosphatase, receptor type, G                      | +42.5 |
| PYCR1        | pyrroline-5-carboxylate reductase-like                              | +12.8 |
| QSOX1        | quiescin Q6 sulfhydryl oxidase 1                                    | +14.5 |
| RAB13        | RAB13, member RAS oncogene family                                   | +44.7 |
| RAD52        | RAD52 homolog ( <i>S. cerevisiae</i> )                              | +20.4 |
| RAPGEF3      | Rap guanine nucleotide exchange factor (GEF) 3                      | +16.1 |
| RARG         | retinoic acid receptor, gamma                                       | +14.3 |
| RBBP8NL      | RBBP8 N-terminal like                                               | +17.6 |
| RBM15        | RNA binding motif protein 15                                        | +26.2 |
| <b>RBM25</b> | RNA binding motif protein 25                                        | +23.1 |
| RCSD1        | RCSD domain containing 1                                            | +16.5 |
| REPIN1       | replication initiator 1                                             | +18.3 |
| RFNG         | RFNG O-fucosylpeptide 3-beta-N-acetylglucosaminyltransferase        | +17.6 |
| RGPD4        | RANBP2-like and GRIP domain containing 4                            | +16.5 |
| RHBDD3       | rhomboid domain containing 3                                        | +15.9 |
| RHCG         | Rh family, C glycoprotein                                           | +23   |
| RIMKLB       | ribosomal modification protein rimK-like family member B            | +30.1 |
| RNF223       | ring finger protein 223                                             | +15.7 |
| RNH1         | ribonuclease/angiogenin inhibitor 1                                 | +18.7 |
| RPL9         | ribosomal protein L9                                                | +33.6 |
| RPS28        | ribosomal protein S28                                               | +17.1 |

|              |                                                                                  |       |
|--------------|----------------------------------------------------------------------------------|-------|
| <b>RRP7A</b> | ribosomal RNA processing 7 homolog A ( <i>S. cerevisiae</i> )                    | +22   |
| RTL1         | retrotransposon-like 1                                                           | +17.8 |
| RUNDC3A      | RUN domain containing 3A                                                         | +23.8 |
| SAMD14       | sterile alpha motif domain containing 14                                         | +26.4 |
| SAPCD2       | suppressor APC domain containing 2                                               | +22.6 |
| SCN1B        | sodium channel, voltage-gated, type I, beta subunit                              | +18.1 |
| SCT          | secretin                                                                         | +12.2 |
| SEPT12       | septin 12                                                                        | +10.9 |
| SEPT5-GP1BB  | SEPT5-GP1BB readthrough                                                          | +27.2 |
| SFN          | stratifin                                                                        | +12.8 |
| SFPQ         | splicing factor proline/glutamine-rich                                           | +17.1 |
| SFTPB        | surfactant protein B                                                             | +16.6 |
| SGCA         | sarcoglycan, alpha (50kDa dystrophin-associated glycoprotein)                    | +17.1 |
| SH3BP5L      | SH3-binding domain protein 5-like                                                | +15.3 |
| SIGLEC11     | sialic acid binding Ig-like lectin 11                                            | +16.5 |
| SLC16A5      | solute carrier family 16 (monocarboxylate transporter), member 5                 | +14   |
| SLC19A3      | solute carrier family 19 (thiamine transporter), member 3                        | +11.2 |
| SLC22A3      | solute carrier family 22 (organic cation transporter), member 3                  | +11   |
| SLC29A2      | solute carrier family 29 (equilibrative nucleoside transporter), member 2        | +9.8  |
| SLC35G3      | solute carrier family 35, member G3                                              | +19.1 |
| SLC5A11      | solute carrier family 5 (sodium/inositol cotransporter), member 11               | +17.5 |
| SLC6A18      | solute carrier family 6 (neutral amino acid transporter), member 18              | +12.4 |
| SMAD3        | SMAD family member 3                                                             | +40.4 |
| SMG9         | SMG9 nonsense mediated mRNA decay factor                                         | +20.1 |
| SMPD4        | sphingomyelin phosphodiesterase 4, neutral membrane (neutral sphingomyelinase-3) | +13   |
| SMTNL2       | smoothelin-like 2                                                                | +15.8 |
| SND1-IT1     | SND1 intronic transcript 1 (non-protein coding)                                  | +28.3 |
| SNORA71C     | small nucleolar RNA, H/ACA box 71C                                               | +14.2 |
| SNORA74B     | small nucleolar RNA, H/ACA box 74B                                               | +15.8 |
| SOX13        | SRY (sex determining region Y)-box 13                                            | +18.7 |
| SOX9         | SRY (sex determining region Y)-box 9                                             | +40.7 |
| SP9          | Sp9 transcription factor                                                         | +18.5 |
| SPATA12      | spermatogenesis associated 12                                                    | +13.6 |

|          |                                                                          |       |
|----------|--------------------------------------------------------------------------|-------|
| SPIDR    | scaffolding protein involved in DNA repair                               | +27.3 |
| SPRN     | shadow of prion protein homolog (zebrafish)                              | +28.9 |
| SSU72    | SSU72 RNA polymerase II CTD phosphatase homolog ( <i>S. cerevisiae</i> ) | +10.2 |
| STX10    | syntaxin 10                                                              | +14.4 |
| STX16    | syntaxin 16                                                              | +28.5 |
| STX3     | syntaxin 3                                                               | +14.9 |
| SUV420H2 | suppressor of variegation 4-20 homolog 2 ( <i>Drosophila</i> )           | +13.7 |
| SYT15    | synaptotagmin XV                                                         | +14.7 |
| SYT8     | synaptotagmin VIII                                                       | +13.2 |
| TBX1     | T-box 1                                                                  | +15.1 |
| TCF7     | transcription factor 7 (T-cell specific, HMG-box)                        | +13.5 |
| TDGF1P3  | teratocarcinoma-derived growth factor 1 pseudogene 3                     | +19.8 |
| TERT     | telomerase reverse transcriptase                                         | +16.4 |
| TF       | transferrin                                                              | +32.1 |
| THEM6    | thioesterase superfamily member 6                                        | +14.5 |
| THSD7B   | thrombospondin, type I, domain containing 7B                             | +11.8 |
| TMEM101  | transmembrane protein 101                                                | +12.2 |
| TMEM150A | transmembrane protein 150A                                               | +24.5 |
| TMEM150B | transmembrane protein 150B                                               | +16.8 |
| TMEM184A | transmembrane protein 184A                                               | +21.1 |
| TMEM247  | uncharacterized LOC101805491 /// transmembrane protein 247               | +12.9 |
| TMEM54   | transmembrane protein 54                                                 | +15   |
| TMEM8A   | transmembrane protein 8A                                                 | +21.3 |
| TMPRSS5  | transmembrane protease, serine 5                                         | +15.5 |
| TMPRSS6  | transmembrane protease, serine 6                                         | +15.4 |
| TNFRSF1B | tumor necrosis factor receptor superfamily, member 1B                    | +15   |
| TOP1MT   | topoisomerase (DNA) I, mitochondrial                                     | +14.4 |
| TPCN2    | two pore segment channel 2                                               | +69.3 |
| TPTE2    | transmembrane phosphoinositide 3-phosphatase and tensin homolog 2        | +18.6 |
| TRIM40   | tripartite motif containing 40                                           | +14.5 |
| TRIM46   | tripartite motif containing 46                                           | +14.4 |
| TRIM7    | tripartite motif containing 7                                            | +12.8 |
| TRMT2A   | tRNA methyltransferase 2 homolog A ( <i>S. cerevisiae</i> )              | +19.6 |



|              |                                                                                                |       |
|--------------|------------------------------------------------------------------------------------------------|-------|
| TRMU         | tRNA 5-methylaminomethyl-2-thiouridylate methyltransferase                                     | +20   |
| TSC2         | tuberous sclerosis 2                                                                           | +18.4 |
| TSC22D4      | TSC22 domain family, member 4                                                                  | +18   |
| TTY6B        | testis-specific transcript, Y-linked 6B (non-protein coding)                                   | +17.3 |
| TTYH2        | tweety family member 2                                                                         | +13.7 |
| TUBGCP2      | tubulin, gamma complex associated protein 2                                                    | +17.5 |
| TXNIP        | thioredoxin interacting protein                                                                | +17.5 |
| TXNRD2       | thioredoxin reductase 2                                                                        | +22.6 |
| UBE2F        | ubiquitin-conjugating enzyme E2F (putative)                                                    | +16.7 |
| UBE2L3       | ubiquitin-conjugating enzyme E2L 3                                                             | +40.9 |
| UBE3A        | ubiquitin protein ligase E3A                                                                   | +42.2 |
| UCK1         | uridine-cytidine kinase 1                                                                      | +20.1 |
| UCKL1        | uridine-cytidine kinase 1-like 1                                                               | +13   |
| UGT2B15      | UDP glucuronosyltransferase 2 family, polypeptide B15                                          | +15.4 |
| UNC80        | unc-80 homolog (C. elegans)                                                                    | +24.2 |
| UPK3A        | uroplakin 3A                                                                                   | +15.2 |
| USF1         | upstream transcription factor 1                                                                | +17.8 |
| USF2         | upstream transcription factor 2, c-fos interacting                                             | +7.3  |
| USP30        | ubiquitin specific peptidase 30                                                                | +15.1 |
| USP6         | ubiquitin specific peptidase 32 /// ubiquitin specific peptidase 6                             | +24.5 |
| USP7         | ubiquitin specific peptidase 7 (herpes virus-associated)                                       | +17.9 |
| VARS         | valyl-tRNA synthetase                                                                          | +13.6 |
| VASH2        | vasohibin 2                                                                                    | +17.8 |
| <b>VCX2</b>  | variable charge, X-linked /// variable charge, X-linked 2                                      | +17.4 |
| VNN1         | vanin 1                                                                                        | +10   |
| VPS13B       | vacuolar protein sorting 13 homolog B (yeast)                                                  | +25.8 |
| VRTN         | vertebrae development associated                                                               | +15.3 |
| <b>WDR81</b> | WD repeat domain 81                                                                            | +13.7 |
| WIPF1        | WAS/WASL interacting protein family, member 1                                                  | +10.6 |
| WRAP73       | WD repeat containing, antisense to TP73                                                        | +22.1 |
| XRCC3        | X-ray repair complementing defective repair in Chinese hamster cells 3                         | +13.6 |
| YJEFN3       | --- /// Homo sapiens YjeF N-terminal domain containing 3 (YJEFN3), transcript variant 2, mRNA. | +16.9 |
| ZACN         | zinc activated ligand-gated ion channel                                                        | +29.7 |

|        |                                          |       |
|--------|------------------------------------------|-------|
| ZBTB7B | zinc finger and BTB domain containing 7B | +16.7 |
| ZFYVE1 | zinc finger, FYVE domain containing 1    | +12.3 |
| ZNF133 | zinc finger protein 133                  | +16.2 |
| ZNF367 | zinc finger protein 367                  | +14.3 |
| ZNF395 | zinc finger protein 395                  | +12.3 |
| ZNF423 | zinc finger protein 423                  | +13.3 |
| ZNF503 | zinc finger protein 503                  | +17.2 |
| ZNF517 | zinc finger protein 517                  | +12   |
| ZNF70  | zinc finger protein 70                   | +15   |

| <b>DEGs with decreased expression in schizophrenia</b> |                                                                                     |                 |
|--------------------------------------------------------|-------------------------------------------------------------------------------------|-----------------|
| <b>Symbol</b>                                          | <b>Gene Title</b>                                                                   | <b>% change</b> |
| <b>ACSL6</b>                                           | acyl-CoA synthetase long-chain family member 6                                      | -28.9           |
| ACTR3                                                  | ARP3 actin-related protein 3 homolog (yeast)                                        | -47.5           |
| ADAM22                                                 | ADAM metallopeptidase domain 22                                                     | -33             |
| ADCY2                                                  | adenylate cyclase 2 (brain)                                                         | -22.8           |
| <b>ADSS</b>                                            | adenylosuccinate synthase                                                           | -22.6           |
| AKAP11                                                 | A kinase (PRKA) anchor protein 11                                                   | -26.3           |
| ALDOA                                                  | aldolase A, fructose-bisphosphate                                                   | -25.4           |
| ALDOC                                                  | aldolase C, fructose-bisphosphate                                                   | -22.4           |
| AMPH                                                   | amphiphysin                                                                         | -24.8           |
| ANAPC13                                                | anaphase promoting complex subunit 13                                               | -58.4           |
| <b>ANK2</b>                                            | ankyrin 2, neuronal                                                                 | -23             |
| <b>AP2M1</b>                                           | adaptor-related protein complex 2, mu 1 subunit                                     | -19.1           |
| AP3B2                                                  | adaptor-related protein complex 3, beta 2 subunit                                   | -36.5           |
| APBB1IP                                                | amyloid beta (A4) precursor protein-binding, family B, member 1 interacting protein | -45.3           |
| APOOL                                                  | apolipoprotein O-like                                                               | -33.1           |
| APP                                                    | amyloid beta (A4) precursor protein                                                 | -14.1           |
| ARHGEF2                                                | Rho/Rac guanine nucleotide exchange factor (GEF) 2                                  | -23.6           |
| ARHGEF6                                                | Rac/Cdc42 guanine nucleotide exchange factor (GEF) 6                                | -25.1           |
| ARL4C                                                  | ADP-ribosylation factor-like 4C                                                     | -16.1           |
| ARL6IP1                                                | ADP-ribosylation factor-like 6 interacting protein 1                                | -21.7           |
| <b>ARL6IP5</b>                                         | ADP-ribosylation factor-like 6 interacting protein 5                                | -24.9           |

|                 |                                                                                                            |       |
|-----------------|------------------------------------------------------------------------------------------------------------|-------|
| ARMCX3          | armadillo repeat containing, X-linked 3                                                                    | -16   |
| ARPC5L          | actin related protein 2/3 complex, subunit 5-like                                                          | -25.9 |
| <b>ARPP19</b>   | cAMP-regulated phosphoprotein, 19kDa                                                                       | -11.4 |
| ASAH2B          | N-acylsphingosine amidohydrolase (non-lysosomal ceramidase) 2B                                             | -35.7 |
| ASNS            | asparagine synthetase (glutamine-hydrolyzing)                                                              | -34.2 |
| ATF4            | activating transcription factor 4                                                                          | -22   |
| ATL1            | atlastin GTPase 1                                                                                          | -26.6 |
| ATP1A1          | ATPase, Na <sup>+</sup> /K <sup>+</sup> transporting, alpha 1 polypeptide                                  | -15   |
| ATP1A3          | ATPase, Na <sup>+</sup> /K <sup>+</sup> transporting, alpha 3 polypeptide /// uncharacterized LOC101927137 | -14.9 |
| <b>ATP2A2</b>   | ATPase, Ca <sup>++</sup> transporting, cardiac muscle, slow twitch 2                                       | -21.1 |
| ATP5B           | ATP synthase, H <sup>+</sup> transporting, mitochondrial F1 complex, beta polypeptide                      | -36   |
| ATP5F1          | ATP synthase, H <sup>+</sup> transporting, mitochondrial Fo complex, subunit B1                            | -17.6 |
| ATP5G3          | ATP synthase, H <sup>+</sup> transporting, mitochondrial Fo complex, subunit C3 (subunit 9)                | -26.5 |
| <b>ATP6V0D1</b> | ATPase, H <sup>+</sup> transporting, lysosomal 38kDa, V0 subunit d1                                        | -22.2 |
| ATP6V1B2        | ATPase, H <sup>+</sup> transporting, lysosomal 56/58kDa, V1 subunit B2                                     | -23.7 |
| ATP6V1E1        | ATPase, H <sup>+</sup> transporting, lysosomal 31kDa, V1 subunit E1                                        | -37.6 |
| <b>ATP6V1G1</b> | ATPase, H <sup>+</sup> transporting, lysosomal 13kDa, V1 subunit G1                                        | -46.4 |
| ATPIF1          | ATPase inhibitory factor 1                                                                                 | -15.7 |
| ATRNL1          | attractin-like 1                                                                                           | -26   |
| <b>BAG1</b>     | BCL2-associated athanogene                                                                                 | -30.7 |
| BCAP29          | B-cell receptor-associated protein 29                                                                      | -39.9 |
| BCL2L2          | BCL2-like 2                                                                                                | -32.5 |
| BCL6            | B-cell CLL/lymphoma 6                                                                                      | -34   |
| BECN1           | beclin 1, autophagy related                                                                                | -16   |
| BLOC1S2         | biogenesis of lysosomal organelles complex-1, subunit 2                                                    | -33.9 |
| BRMS1L          | breast cancer metastasis-suppressor 1-like                                                                 | -34.3 |
| BTBD3           | BTB (POZ) domain containing 3                                                                              | -32.6 |
| C18orf25        | chromosome 18 open reading frame 25                                                                        | -21.8 |
| C19orf60        | chromosome 19 open reading frame 60                                                                        | -24.8 |
| C4orf3          | chromosome 4 open reading frame 3                                                                          | -35.6 |
| C6orf106        | chromosome 6 open reading frame 106                                                                        | -27.7 |
| CAB39           | calcium binding protein 39                                                                                 | -26.5 |
| <b>CADM2</b>    | cell adhesion molecule 2                                                                                   | -33.6 |

|               |                                                             |       |
|---------------|-------------------------------------------------------------|-------|
| CADPS         | Ca <sup>++</sup> -dependent secretion activator             | -24.7 |
| <b>CAP2</b>   | CAP, adenylate cyclase-associated protein, 2 (yeast)        | -29.8 |
| CAPZA2        | capping protein (actin filament) muscle Z-line, alpha 2     | -39.4 |
| CCDC136       | coiled-coil domain containing 136                           | -28.4 |
| CCDC184       | coiled-coil domain containing 184                           | -20.8 |
| <b>CCDC91</b> | coiled-coil domain containing 91                            | -31.3 |
| CCNI          | cyclin I                                                    | -15.7 |
| CCT7          | chaperonin containing TCP1, subunit 7 (eta)                 | -31.2 |
| CD200         | CD200 molecule                                              | -25.9 |
| CDC42         | cell division cycle 42                                      | -20.2 |
| CDK5          | cyclin-dependent kinase 5                                   | -36.3 |
| CERK          | ceramide kinase                                             | -29   |
| CHGB          | chromogranin B (secretogranin 1)                            | -35.9 |
| CHMP2B        | charged multivesicular body protein 2B                      | -26.5 |
| CKB           | creatine kinase, brain                                      | -24.1 |
| CLCN4         | chloride channel, voltage-sensitive 4                       | -44.2 |
| <b>CLTC</b>   | clathrin, heavy chain (Hc)                                  | -19.9 |
| <b>CMAS</b>   | cytidine monophosphate N-acetylneuraminic acid synthetase   | -30   |
| CNPY2         | canopy FGF signaling regulator 2                            | -29.6 |
| COLGALT2      | collagen beta(1-O)galactosyltransferase 2                   | -27.9 |
| COPRS         | coordinator of PRMT5, differentiation stimulator            | -27.4 |
| COPS7A        | COP9 signalosome subunit 7A                                 | -31.1 |
| COX4I1        | cytochrome c oxidase subunit IV isoform 1                   | -17.4 |
| COX5A         | cytochrome c oxidase subunit Va                             | -23.3 |
| COX6B1        | cytochrome c oxidase subunit VIb polypeptide 1 (ubiquitous) | -15.9 |
| COX7A2        | cytochrome c oxidase subunit VIIa polypeptide 2 (liver)     | -28.8 |
| CSDE1         | cold shock domain containing E1, RNA-binding                | -22.2 |
| CSPG5         | chondroitin sulfate proteoglycan 5 (neuroglycan C)          | -33.1 |
| CTNND2        | catenin (cadherin-associated protein), delta 2              | -22.1 |
| DCK           | deoxycytidine kinase                                        | -27.5 |
| DCTN6         | dynactin 6                                                  | -34.3 |
| DDB1          | damage-specific DNA binding protein 1, 127kDa               | -12.4 |
| DDX25         | DEAD (Asp-Glu-Ala-Asp) box helicase 25                      | -20.6 |

|               |                                                                    |       |
|---------------|--------------------------------------------------------------------|-------|
| DLC1          | DLC1 Rho GTPase activating protein                                 | -21.4 |
| DNAJB9        | DnaJ (Hsp40) homolog, subfamily B, member 9                        | -23.9 |
| DNAJC15       | DnaJ (Hsp40) homolog, subfamily C, member 15                       | -45.7 |
| DNAJC18       | DnaJ (Hsp40) homolog, subfamily C, member 18                       | -35.2 |
| DNAJC6        | DnaJ (Hsp40) homolog, subfamily C, member 6                        | -29.1 |
| DNM3          | dynamamin 3                                                        | -19.5 |
| DPYSL4        | dihydropyrimidinase-like 4                                         | -31.5 |
| <b>EFTUD2</b> | elongation factor Tu GTP binding domain containing 2               | -51.8 |
| EHD3          | EH-domain containing 3                                             | -22.6 |
| EID1          | EP300 interacting inhibitor of differentiation 1                   | -17.2 |
| EIF2S1        | eukaryotic translation initiation factor 2, subunit 1 alpha, 35kDa | -38.5 |
| EIF5          | eukaryotic translation initiation factor 5                         | -45.5 |
| EMC3          | ER membrane protein complex subunit 3                              | -27.6 |
| ENSA          | endosulfine alpha                                                  | -27.3 |
| EPHA4         | EPH receptor A4                                                    | -31.8 |
| <b>EPS15</b>  | epidermal growth factor receptor pathway substrate 15              | -31.2 |
| <b>ERP29</b>  | endoplasmic reticulum protein 29                                   | -34.5 |
| <b>ESRRG</b>  | estrogen-related receptor gamma                                    | -45.3 |
| ETS1          | v-ets avian erythroblastosis virus E26 oncogene homolog 1          | -37.3 |
| <b>EXOSC9</b> | exosome component 9                                                | -31.8 |
| FAM169A       | family with sequence similarity 169, member A                      | -32.6 |
| FAM174A       | family with sequence similarity 174, member A                      | -44.6 |
| FAM49B        | family with sequence similarity 49, member B                       | -24.3 |
| FAM69A        | family with sequence similarity 69, member A                       | -26.3 |
| FAT1          | FAT atypical cadherin 1                                            | -43.6 |
| FBLN7         | fibulin 7                                                          | -33.9 |
| FBXO28        | F-box protein 28                                                   | -31.5 |
| <b>FDPS</b>   | farnesyl diphosphate synthase                                      | -23.3 |
| FEZ1          | fasciculation and elongation protein zeta 1 (zygin I)              | -50.9 |
| <b>FNDC5</b>  | fibronectin type III domain containing 5                           | -36.9 |
| FOXN3         | forkhead box N3                                                    | -36.2 |
| FYTTD1        | forty-two-three domain containing 1                                | -31.6 |
| G3BP2         | GTPase activating protein (SH3 domain) binding protein 2           | -29.2 |

|                  |                                                                                         |       |
|------------------|-----------------------------------------------------------------------------------------|-------|
| GABARAPL1        | GABA(A) receptor-associated protein like 1                                              | -19.4 |
| <b>GABARAPL2</b> | GABA(A) receptor-associated protein-like 2                                              | -24.9 |
| GABRA1           | gamma-aminobutyric acid (GABA) A receptor, alpha 1                                      | -26.3 |
| GAD2             | glutamate decarboxylase 2 (pancreatic islets and brain, 65kDa)                          | -27.7 |
| GATS             | GATS, stromal antigen 3 opposite strand                                                 | -35   |
| GDI1             | GDP dissociation inhibitor 1                                                            | -10.4 |
| GPRASP1          | G protein-coupled receptor associated sorting protein 1                                 | -20.7 |
| GRIN2A           | glutamate receptor, ionotropic, N-methyl D-aspartate 2A                                 | -24.9 |
| GRIP1            | glutamate receptor interacting protein 1                                                | -43.1 |
| HACE1            | HECT domain and ankyrin repeat containing E3 ubiquitin protein ligase 1                 | -30.2 |
| HIF1A            | hypoxia inducible factor 1, alpha subunit (basic helix-loop-helix transcription factor) | -28.2 |
| HIVEP2           | human immunodeficiency virus type I enhancer binding protein 2                          | -28.6 |
| HMGCS1           | 3-hydroxy-3-methylglutaryl-CoA synthase 1 (soluble)                                     | -25.9 |
| HOOK3            | hook microtubule-tethering protein 3                                                    | -18.9 |
| <b>HSBP1</b>     | heat shock factor binding protein 1                                                     | -37.4 |
| HSD17B12         | hydroxysteroid (17-beta) dehydrogenase 12                                               | -35.2 |
| HSPA12A          | heat shock 70kDa protein 12A                                                            | -22.7 |
| HSPA9            | heat shock 70kDa protein 9 (mortalin)                                                   | -25.4 |
| HSPB11           | heat shock protein family B (small), member 11                                          | -28.9 |
| IBTK             | inhibitor of Bruton agammaglobulinemia tyrosine kinase                                  | -26.2 |
| IDH3B            | isocitrate dehydrogenase 3 (NAD+) beta                                                  | -43.5 |
| IDS              | iduronate 2-sulfatase                                                                   | -25.1 |
| IGFBP6           | insulin-like growth factor binding protein 6                                            | -31.3 |
| IL6ST            | interleukin 6 signal transducer                                                         | -23.8 |
| INPP5A           | inositol polyphosphate-5-phosphatase, 40kDa                                             | -22   |
| INSIG1           | insulin induced gene 1                                                                  | -27.7 |
| IRGQ             | immunity-related GTPase family, Q                                                       | -24.3 |
| ISCU             | iron-sulfur cluster assembly enzyme                                                     | -21.6 |
| KCNIP2           | Kv channel interacting protein 2                                                        | -32.8 |
| KCNS3            | potassium voltage-gated channel, delayed-rectifier, subfamily S, member 3               | -31.5 |
| KCTD8            | potassium channel tetramerization domain containing 8                                   | -31.8 |
| KIAA1107         | KIAA1107                                                                                | -30.5 |
| KIAA1109         | KIAA1109                                                                                | -15.7 |

|               |                                                             |       |
|---------------|-------------------------------------------------------------|-------|
| KIF1A         | kinesin family member 1A                                    | -18.2 |
| <b>KIF1B</b>  | kinesin family member 1B                                    | -30   |
| KIF3C         | kinesin family member 3C                                    | -26.8 |
| KIF5C         | kinesin family member 5C                                    | -29.5 |
| KIFAP3        | kinesin-associated protein 3                                | -35.7 |
| KLC1          | kinesin light chain 1                                       | -20   |
| KLF9          | Kruppel-like factor 9                                       | -30.4 |
| KLHL42        | kelch-like family member 42                                 | -22   |
| KPNA6         | karyopherin alpha 6 (importin alpha 7)                      | -35.4 |
| <b>KPNB1</b>  | karyopherin (importin) beta 1                               | -31.6 |
| LAPTM4B       | lysosomal protein transmembrane 4 beta                      | -29.1 |
| LBH           | limb bud and heart development                              | -34.2 |
| LGALS1        | lectin, galactoside-binding, soluble, 1                     | -26.8 |
| LMBRD1        | LMBR1 domain containing 1                                   | -32.8 |
| LOC284441     | actin-related protein 2 pseudogene                          | -20.6 |
| LYNX1         | Ly6/neurotoxin 1                                            | -17.9 |
| MAGEL2        | MAGE-like 2                                                 | -18   |
| MAP4          | microtubule-associated protein 4                            | -33   |
| MAPK9         | mitogen-activated protein kinase 9                          | -28.9 |
| MAPRE2        | microtubule-associated protein, RP/EB family, member 2      | -35.4 |
| MBD2          | methyl-CpG binding domain protein 2                         | -27.9 |
| MEAF6         | MYST/Esa1-associated factor 6                               | -18.6 |
| MFN2          | mitofusin 2                                                 | -27.6 |
| MPP1          | membrane protein, palmitoylated 1, 55kDa                    | -29.2 |
| MRFAP1        | Morf4 family associated protein 1                           | -28.2 |
| <b>MRPL33</b> | mitochondrial ribosomal protein L33                         | -41.8 |
| MRPL52        | mitochondrial ribosomal protein L52                         | -31.7 |
| MRPL9         | mitochondrial ribosomal protein L9                          | -34.2 |
| MTMR7         | myotubularin related protein 7                              | -28.4 |
| <b>MYADM</b>  | myeloid-associated differentiation marker                   | -30.2 |
| <b>MYL6</b>   | myosin, light chain 6, alkali, smooth muscle and non-muscle | -23.4 |
| MYO5A         | myosin VA (heavy chain 12, myoxin)                          | -24.8 |
| NACA          | nascent polypeptide-associated complex alpha subunit        | -42.7 |

|                |                                                                                   |       |
|----------------|-----------------------------------------------------------------------------------|-------|
| NAP1L2         | nucleosome assembly protein 1-like 2                                              | -38.1 |
| NAP1L5         | nucleosome assembly protein 1-like 5                                              | -27.6 |
| NARS           | asparaginyl-tRNA synthetase                                                       | -26.7 |
| NAT8L          | N-acetyltransferase 8-like (GCN5-related, putative)                               | -22.3 |
| NBEA           | neurobeachin                                                                      | -38.7 |
| NBR1           | neighbor of BRCA1 gene 1                                                          | -48.9 |
| NDRG3          | NDRG family member 3                                                              | -16.8 |
| NDRG4          | NDRG family member 4                                                              | -7.5  |
| NDUFA1         | NADH dehydrogenase (ubiquinone) 1 alpha subcomplex, 1, 7.5kDa                     | -20.4 |
| <b>NDUFA13</b> | NADH dehydrogenase (ubiquinone) 1 alpha subcomplex, 13                            | -54.8 |
| NDUFA3         | NADH dehydrogenase (ubiquinone) 1 alpha subcomplex, 3, 9kDa                       | -19.2 |
| NDUFA6         | NADH dehydrogenase (ubiquinone) 1 alpha subcomplex, 6, 14kDa                      | -29.2 |
| NDUFB2         | NADH dehydrogenase (ubiquinone) 1 beta subcomplex, 2, 8kDa                        | -25.7 |
| NDUFB3         | NADH dehydrogenase (ubiquinone) 1 beta subcomplex, 3, 12kDa                       | -29.5 |
| NDUFB6         | NADH dehydrogenase (ubiquinone) 1 beta subcomplex, 6, 17kDa                       | -33.5 |
| NDUFB8         | NADH dehydrogenase (ubiquinone) 1 beta subcomplex, 8, 19kDa                       | -32.5 |
| <b>NDUFB9</b>  | NADH dehydrogenase (ubiquinone) 1 beta subcomplex, 9, 22kDa                       | -26.6 |
| NDUFS2         | NADH dehydrogenase (ubiquinone) Fe-S protein 2, 49kDa (NADH-coenzyme Q reductase) | -40.4 |
| NDUFS3         | NADH dehydrogenase (ubiquinone) Fe-S protein 3, 30kDa (NADH-coenzyme Q reductase) | -13.8 |
| NDUFV1         | NADH dehydrogenase (ubiquinone) flavoprotein 1, 51kDa                             | -29   |
| NEFL           | neurofilament, light polypeptide                                                  | -18.4 |
| <b>NF1</b>     | neurofibromin-like /// neurofibromin 1                                            | -38.6 |
| <b>NNT</b>     | nicotinamide nucleotide transhydrogenase                                          | -38.9 |
| <b>NR1D2</b>   | nuclear receptor subfamily 1, group D, member 2                                   | -40.1 |
| NRIP3          | nuclear receptor interacting protein 3                                            | -23.5 |
| NRXN1          | neurexin 1                                                                        | -31.5 |
| NSF            | uncharacterized LOC101930324 /// N-ethylmaleimide-sensitive factor                | -25.3 |
| <b>NTM</b>     | neurotrimin                                                                       | -45.1 |
| NTN4           | netrin 4                                                                          | -37.1 |
| NTRK2          | neurotrophic tyrosine kinase, receptor, type 2                                    | -27.5 |
| NUAK1          | NUAK family, SNF1-like kinase, 1                                                  | -23.4 |
| NUDC           | nudC nuclear distribution protein                                                 | -29.4 |
| NUDT21         | nudix (nucleoside diphosphate linked moiety X)-type motif 21                      | -30.3 |



|                 |                                                                             |       |
|-----------------|-----------------------------------------------------------------------------|-------|
| OCIAD1          | OCIA domain containing 1                                                    | -17.7 |
| OLFM1           | olfactomedin 1                                                              | -28.8 |
| OSBPL10         | oxysterol binding protein-like 10                                           | -33.9 |
| OSBPL3          | oxysterol binding protein-like 3                                            | -30.1 |
| OXCT1           | 3-oxoacid CoA transferase 1                                                 | -28.3 |
| <b>PAFAH1B1</b> | platelet-activating factor acetylhydrolase 1b, regulatory subunit 1 (45kDa) | -28.2 |
| PAIP2           | poly(A) binding protein interacting protein 2                               | -28.7 |
| PBX1            | pre-B-cell leukemia homeobox 1                                              | -29.7 |
| PDIA6           | protein disulfide isomerase family A, member 6                              | -29.7 |
| PDSS2           | prenyl (decaprenyl) diphosphate synthase, subunit 2                         | -37.8 |
| <b>PFN2</b>     | profilin 2                                                                  | -28.4 |
| PIGS            | phosphatidylinositol glycan anchor biosynthesis, class S                    | -25.5 |
| PINK1           | PTEN induced putative kinase 1                                              | -25.6 |
| PIP4K2B         | phosphatidylinositol-5-phosphate 4-kinase, type II, beta                    | -30.1 |
| PIP5K1B         | phosphatidylinositol-4-phosphate 5-kinase, type I, beta                     | -30.7 |
| <b>PITPNB</b>   | phosphatidylinositol transfer protein, beta                                 | -52.4 |
| <b>PKM</b>      | pyruvate kinase, muscle                                                     | -9.7  |
| PLCXD3          | phosphatidylinositol-specific phospholipase C, X domain containing 3        | -25.7 |
| PNMA2           | paraneoplastic Ma antigen 2                                                 | -24.4 |
| <b>PPP1CB</b>   | protein phosphatase 1, catalytic subunit, beta isozyme                      | -39.2 |
| PPP1R12B        | protein phosphatase 1, regulatory subunit 12B                               | -24.3 |
| PPP3CB          | protein phosphatase 3, catalytic subunit, beta isozyme                      | -43.1 |
| <b>PPT1</b>     | palmitoyl-protein thioesterase 1                                            | -47.8 |
| PRCP            | prolylcarboxypeptidase (angiotensinase C)                                   | -30.3 |
| PRDX2           | peroxiredoxin 2                                                             | -30   |
| PRDX5           | peroxiredoxin 5                                                             | -34.3 |
| PREPL           | prolyl endopeptidase-like                                                   | -29.6 |
| PRKACA          | protein kinase, cAMP-dependent, catalytic, alpha                            | -30.3 |
| PRKACB          | protein kinase, cAMP-dependent, catalytic, beta                             | -21.8 |
| PRKAG2          | protein kinase, AMP-activated, gamma 2 non-catalytic subunit                | -21.1 |
| <b>PRKAR1A</b>  | protein kinase, cAMP-dependent, regulatory, type I, alpha                   | -14.5 |
| PRKCI           | protein kinase C, iota                                                      | -39.6 |
| PRMT2           | protein arginine methyltransferase 2                                        | -31.2 |

|              |                                                                                                                        |       |
|--------------|------------------------------------------------------------------------------------------------------------------------|-------|
| PRRT3        | proline-rich transmembrane protein 3                                                                                   | -17.3 |
| <b>PSAP</b>  | prosaposin                                                                                                             | -22.2 |
| PSD3         | pleckstrin and Sec7 domain containing 3                                                                                | -27.4 |
| <b>PSMC1</b> | proteasome (prosome, macropain) 26S subunit, ATPase, 1                                                                 | -34.1 |
| PSMD12       | proteasome (prosome, macropain) 26S subunit, non-ATPase, 12                                                            | -26.5 |
| PSMD4        | proteasome (prosome, macropain) 26S subunit, non-ATPase, 4                                                             | -35   |
| PTP4A1       | protein tyrosine phosphatase type IVA, member 1                                                                        | -36.2 |
| PTPRA        | protein tyrosine phosphatase, receptor type, A                                                                         | -32.2 |
| PTPRE        | protein tyrosine phosphatase, receptor type, E                                                                         | -32   |
| PTPRN2       | protein tyrosine phosphatase, receptor type, N polypeptide 2                                                           | -29.5 |
| PTPRS        | protein tyrosine phosphatase, receptor type, S                                                                         | -20.6 |
| PVALB        | parvalbumin                                                                                                            | -22.3 |
| RAB11A       | RAB11A, member RAS oncogene family                                                                                     | -42.9 |
| RAB11FIP4    | RAB11 family interacting protein 4 (class II)                                                                          | -28.8 |
| RAB22A       | RAB22A, member RAS oncogene family                                                                                     | -22.7 |
| RAB33A       | RAB33A, member RAS oncogene family                                                                                     | -34   |
| RAB6B        | RAB6B, member RAS oncogene family                                                                                      | -30.4 |
| RAC1         | ras-related C3 botulinum toxin substrate 1 (rho family, small GTP binding protein Rac1)                                | -49.4 |
| <b>RAD21</b> | RAD21 homolog (S. pombe)                                                                                               | -41   |
| RAD23A       | RAD23 homolog A (S. cerevisiae)                                                                                        | -20.2 |
| RAN          | RAN, member RAS oncogene family                                                                                        | -17.5 |
| RAP1GDS1     | RAP1, GTP-GDP dissociation stimulator 1                                                                                | -36.3 |
| RBFOX2       | RNA binding protein, fox-1 homolog (C. elegans) 2                                                                      | -31   |
| RBMXL1       | RNA binding motif protein, X-linked-like 1                                                                             | -30.8 |
| <b>RGS4</b>  | regulator of G-protein signaling 4                                                                                     | -47.3 |
| RGS7BP       | regulator of G-protein signaling 7 binding protein                                                                     | -35.2 |
| RHEB         | Ras homolog enriched in brain                                                                                          | -22.8 |
| RHOQ         | ras homolog family member Q                                                                                            | -42.4 |
| RIOK1        | RIO kinase 1                                                                                                           | -48.4 |
| RNF5         | ring finger protein 5, E3 ubiquitin protein ligase /// ring finger protein 5, E3 ubiquitin protein ligase pseudogene 1 | -34.7 |
| RPL41        | ribosomal protein L41                                                                                                  | -20.6 |
| <b>RTN1</b>  | reticulon 1                                                                                                            | -10   |

|               |                                                                                                   |       |
|---------------|---------------------------------------------------------------------------------------------------|-------|
| <b>RTN4</b>   | reticulon 4                                                                                       | -46.1 |
| RUFY3         | RUN and FYVE domain containing 3                                                                  | -13.2 |
| SAR1A         | secretion associated, Ras related GTPase 1A                                                       | -33.4 |
| SARAF         | store-operated calcium entry-associated regulatory factor                                         | -20.9 |
| SARS          | seryl-tRNA synthetase                                                                             | -25.3 |
| SAT2          | spermidine/spermine N1-acetyltransferase family member 2                                          | -38.3 |
| SATB1         | SATB homeobox 1                                                                                   | -22.1 |
| <b>SCAMP1</b> | secretory carrier membrane protein 1                                                              | -30   |
| SCOC          | short coiled-coil protein                                                                         | -23   |
| <b>SCP2</b>   | sterol carrier protein 2                                                                          | -32.8 |
| SDCBP         | syndecan binding protein (syntenin)                                                               | -19.2 |
| SEC23A        | Sec23 homolog A ( <i>S. cerevisiae</i> )                                                          | -27.6 |
| <b>SEPT4</b>  | septin 4                                                                                          | -27.9 |
| SH3BGRL       | SH3 domain binding glutamate-rich protein like                                                    | -26   |
| SHOC2         | soc-2 suppressor of clear homolog ( <i>C. elegans</i> )                                           | -29.8 |
| SIK3          | SIK family kinase 3                                                                               | -26.8 |
| SLC24A2       | solute carrier family 24 (sodium/potassium/calcium exchanger), member 2                           | -25   |
| SLC25A3       | solute carrier family 25 (mitochondrial carrier; phosphate carrier), member 3                     | -32.9 |
| SLC25A46      | solute carrier family 25, member 46                                                               | -34.9 |
| SLC32A1       | solute carrier family 32 (GABA vesicular transporter), member 1                                   | -32.4 |
| SLC35B4       | solute carrier family 35 (UDP-xylose/UDP-N-acetylglucosamine transporter), member B4              | -36.6 |
| SLC4A1AP      | solute carrier family 4 (anion exchanger), member 1, adaptor protein                              | -44.4 |
| SLC6A1        | solute carrier family 6 (neurotransmitter transporter), member 1                                  | -31.4 |
| SMARCA4       | SWI/SNF related, matrix associated, actin dependent regulator of chromatin, subfamily a, member 4 | -21.8 |
| SMIM14        | small integral membrane protein 14                                                                | -30.3 |
| <b>SNAP25</b> | synaptosomal-associated protein, 25kDa                                                            | -14.3 |
| SNF8          | SNF8, ESCRT-II complex subunit                                                                    | -22   |
| SOBP          | sine oculis binding protein homolog ( <i>Drosophila</i> )                                         | -25.1 |
| <b>SOD1</b>   | superoxide dismutase 1, soluble                                                                   | -17.9 |
| SPOCK3        | sparc/osteonectin, cwcv and kazal-like domains proteoglycan (testican) 3                          | -25.7 |
| SRPRB         | signal recognition particle receptor, B subunit                                                   | -45.2 |
| ST6GAL1       | ST6 beta-galactosamide alpha-2,6-sialyltransferase 1                                              | -29.5 |
| STK39         | serine threonine kinase 39                                                                        | -27.8 |

|               |                                                                    |       |
|---------------|--------------------------------------------------------------------|-------|
| STMN2         | stathmin 2                                                         | -14.1 |
| STS           | steroid sulfatase (microsomal), isozyme S                          | -32.8 |
| STX12         | syntaxin 12                                                        | -29.5 |
| <b>SUMO1</b>  | small ubiquitin-like modifier 1                                    | -22.1 |
| SUMO3         | small ubiquitin-like modifier 3                                    | -19.5 |
| SUSD1         | sushi domain containing 1                                          | -43.6 |
| SV2A          | synaptic vesicle glycoprotein 2A                                   | -18.9 |
| SYT1          | synaptotagmin I                                                    | -21.6 |
| SYT13         | synaptotagmin XIII                                                 | -29.4 |
| TACC1         | transforming, acidic coiled-coil containing protein 1              | -29.2 |
| TAOK1         | TAO kinase 1                                                       | -18.4 |
| <b>TBCD</b>   | uncharacterized LOC101929597 /// tubulin folding cofactor D        | -29.3 |
| TCEAL7        | transcription elongation factor A (SII)-like 7                     | -33.1 |
| TENM2         | teneurin transmembrane protein 2                                   | -33.5 |
| TMCC1         | transmembrane and coiled-coil domain family 1                      | -24.9 |
| TMCO1         | transmembrane and coiled-coil domains 1                            | -38   |
| TMEM120A      | transmembrane protein 120A                                         | -13.4 |
| TMEM155       | transmembrane protein 155                                          | -36.5 |
| TMEM65        | transmembrane protein 65                                           | -36.4 |
| TMSB4X        | thymosin beta 4, X-linked                                          | -17   |
| TOLLIP        | toll interacting protein                                           | -57.7 |
| TOR1A         | torsin family 1, member A (torsin A)                               | -30.7 |
| TP53BP1       | tumor protein p53 binding protein 1                                | -12.7 |
| TP53INP2      | tumor protein p53 inducible nuclear protein 2                      | -36.6 |
| TPST2         | tyrosylprotein sulfotransferase 2                                  | -38.2 |
| TRAF3IP1      | TNF receptor-associated factor 3 interacting protein 1             | -26.6 |
| <b>TRIM37</b> | tripartite motif containing 37                                     | -45.7 |
| TRPC1         | transient receptor potential cation channel, subfamily C, member 1 | -39.1 |
| TSC22D1       | TSC22 domain family, member 1                                      | -34.2 |
| <b>TSN</b>    | translin                                                           | -24.5 |
| TSNAX         | translin-associated factor X                                       | -19   |
| TTC39B        | tetratricopeptide repeat domain 39B                                | -34.5 |
| TULP4         | tubby like protein 4                                               | -16.2 |

|              |                                                                                 |       |
|--------------|---------------------------------------------------------------------------------|-------|
| TXN          | thioredoxin                                                                     | -36.6 |
| UBA3         | ubiquitin-like modifier activating enzyme 3                                     | -33.8 |
| UBE2K        | ubiquitin-conjugating enzyme E2K                                                | -36.2 |
| UGP2         | UDP-glucose pyrophosphorylase 2                                                 | -35.8 |
| UQCRC1       | ubiquinol-cytochrome c reductase core protein I                                 | -46.5 |
| UTRN         | utrophin                                                                        | -29.1 |
| VAPB         | VAMP (vesicle-associated membrane protein)-associated protein B and C           | -33.1 |
| VCPIP1       | valosin containing protein (p97)/p47 complex interacting protein 1              | -30.4 |
| VKORC1L1     | vitamin K epoxide reductase complex, subunit 1-like 1                           | -32.4 |
| <b>VSNL1</b> | visinin-like 1                                                                  | -12.9 |
| <b>WDR13</b> | WD repeat domain 13                                                             | -31.8 |
| WDR37        | WD repeat domain 37                                                             | -29.5 |
| <b>WDR41</b> | WD repeat domain 41                                                             | -49.8 |
| WDR47        | WD repeat domain 47                                                             | -32.1 |
| WLS          | wntless Wnt ligand secretion mediator                                           | -28.4 |
| WSB2         | WD repeat and SOCS box containing 2                                             | -30.6 |
| WSCD2        | WSC domain containing 2                                                         | -16.9 |
| YME1L1       | YME1-like 1 ATPase                                                              | -29.1 |
| YWHAE        | tyrosine 3-monooxygenase/tryptophan 5-monooxygenase activation protein, epsilon | -18.6 |
| YWHAQ        | tyrosine 3-monooxygenase/tryptophan 5-monooxygenase activation protein, theta   | -35.7 |
| ZBTB38       | zinc finger and BTB domain containing 38                                        | -24.4 |
| ZHX1         | zinc fingers and homeoboxes 1                                                   | -29.7 |
| ZNF428       | zinc finger protein 428                                                         | -29.9 |

Differential expression was determined using a 5% FDR. Bolded genes showed differential expression for more than one probeset, % change for the largest difference is shown.

**Supplementary Table 4.** Potential upstream molecular regulators of PV cell DEGs (A) and PC DEGs (B) in schizophrenia subjects.

A. PV cell upstream regulators

| <b>Upstream regulator</b>     | <b>Molecule type</b>     | <b>DEGs potentially regulated</b> |
|-------------------------------|--------------------------|-----------------------------------|
| <u>Activated regulators</u>   |                          |                                   |
| RICTOR                        | mTORC2 signaling complex | 35                                |
| IFNG                          | cytokine                 | 75                                |
| KDM5A                         | transcription regulator  | 18                                |
| Cisplatin (drug)              | tumor suppressor drug    | 44                                |
| CSF2                          | cytokine                 | 24                                |
| E. coli B4 lipopolysaccharide | immune stimulant         | 16                                |
| STAT3                         | transcription regulator  | 28                                |
| EP300                         | transcription regulator  | 25                                |
| <u>Inhibited regulators</u>   |                          |                                   |
| ADORA2A                       | adenosine receptor       | 16                                |
| BDNF                          | neurotrophic factor      | 25                                |
| NFE2L2                        | transcription regulator  | 28                                |
| 1,2-dithiol-3-thione (drug)   | ROS inhibiting drug      | 19                                |
| RB1                           | transcription regulator  | 26                                |
| INSR                          | insulin receptor         | 26                                |

B. PC upstream regulators

| <b>Upstream regulator</b>   | <b>Molecule type</b>                        | <b>DEGs potentially regulated</b> |
|-----------------------------|---------------------------------------------|-----------------------------------|
| <u>Activated regulators</u> |                                             |                                   |
| RICTOR                      | mTORC2 signaling complex                    | 109                               |
| CD 437 (retinoid drug)      | binds RXR                                   | 65                                |
| ST1926 (retinoid drug)      | binds retinoid receptors                    | 58                                |
| 5-fluorouracil (drug)       | nucleic acid synthesis inhibitor            | 61                                |
| Sirolimus (drug)            | mTOR inhibitor                              | 81                                |
| KDM5A                       | transcription regulator                     | 37                                |
| CD3                         | immune transmembrane receptor               | 69                                |
| valproic acid (drug)        | HDAC inhibitor                              | 53                                |
| MAP4K4                      | kinase                                      | 23                                |
| CD28                        | immune transmembrane receptor               | 34                                |
| POR                         | electron transport protein                  | 20                                |
| NR3C2                       | aldosterone/glucocorticoid nuclear receptor | 15                                |
| Prednisolone (drug)         | binds androgen receptor                     | 27                                |

|                                                  |                                |     |
|--------------------------------------------------|--------------------------------|-----|
| GnRH analog                                      | gonadotropin-releasing hormone | 43  |
| cholesterol                                      | lipid                          | 17  |
| PD98059 (drug)                                   | kinase inhibitor               | 38  |
| <u>Inhibited regulators</u>                      |                                |     |
| 1,2-dithiol-3-thione (drug)                      | ROS inhibiting drug            | 46  |
| NFE2L2                                           | transcription regulator        | 57  |
| RB1                                              | transcription regulator        | 53  |
| IGF1R                                            | transmembrane receptor         | 37  |
| Esrra                                            | transcription regulator        | 19  |
| MYCN                                             | transcription regulator        | 48  |
| VEGFA                                            | growth factor                  | 34  |
| Bortezomib (drug)                                | proteasome activator           | 30  |
| INSR                                             | insulin receptor               | 46  |
| pirinixic acid (drug)                            | ROS inhibiting drug            | 47  |
| mono-(2-ethylhexyl)phthalate (drug)              | ROS inhibiting drug            | 28  |
| PPARGC1A                                         | transcription regulator        | 30  |
| hydrogen peroxide (drug)                         | ROS product                    | 46  |
| Mibolerone (drug)                                | inhibits androgen receptor     | 22  |
| ARNT                                             | transcription regulator        | 17  |
| KRAS                                             | enzyme                         | 40  |
| benzyloxycarbonyl-Leu-Leu-Leu<br>aldehyde (drug) | protease inhibitor             | 32  |
| Rosiglitazone (drug)                             | PPARGC1A activator             | 31  |
| MYC                                              | transcription regulator        | 94  |
| HIF1A                                            | transcription regulator        | 38  |
| Curcumin (drug)                                  | ROS inhibiting drug            | 31  |
| Methylprednisolone (drug)                        | binds androgen receptor        | 48  |
| beta-estradiol                                   | binds estrogen receptor        | 130 |
| BDNF                                             | neurotrophic factor            | 33  |
| Forskolin (drug)                                 | activates adenylate cyclase    | 52  |
| RAF1                                             | kinase                         | 19  |
| XBP1                                             | transcription regulator        | 23  |
| SYVN1                                            | transporter                    | 18  |

---

Abbreviations: mTOR- mammalian target of rapamycin, ROS- reactive oxygen species, RXR- retinoid X receptor, HDAC- histone deacetylase

Supplementary Figure1

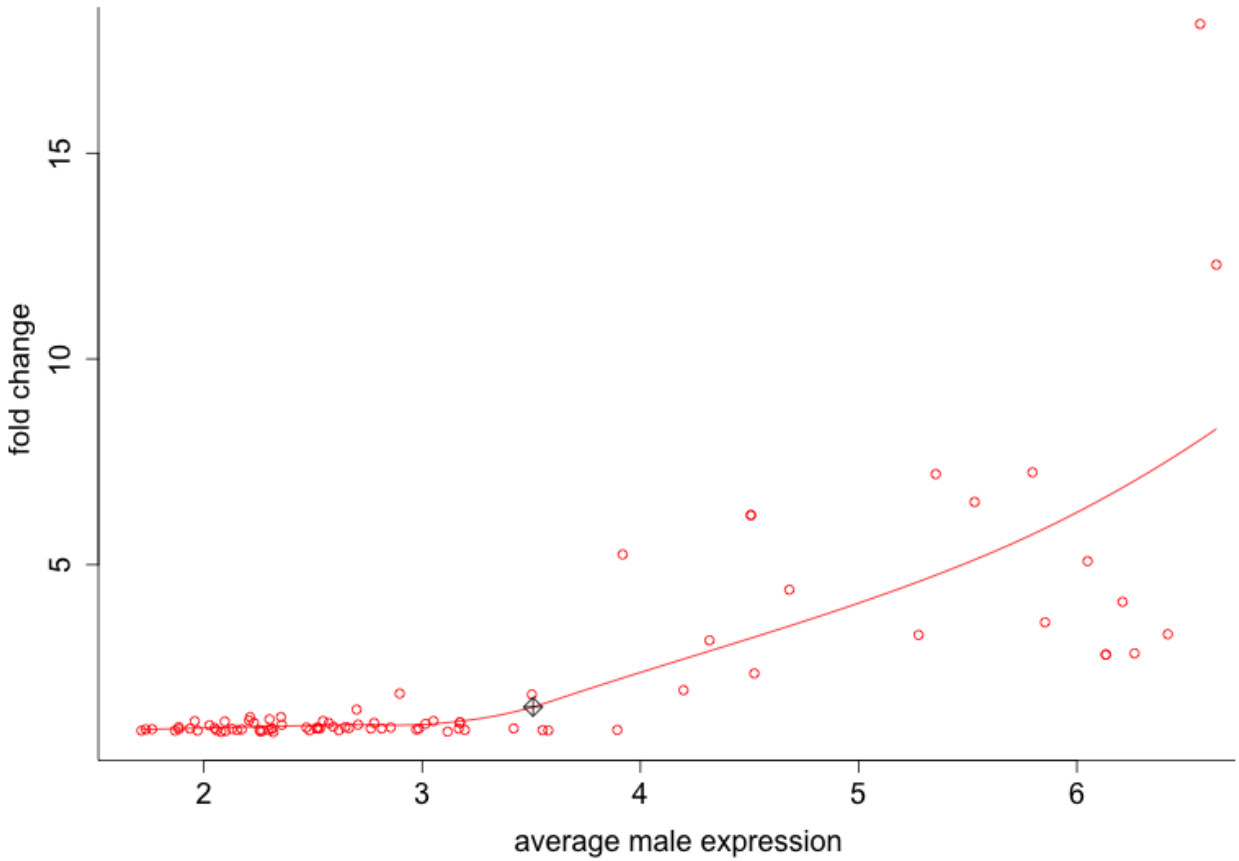



A

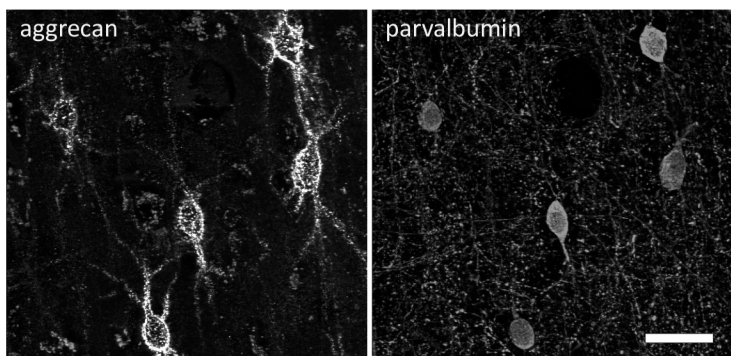

B

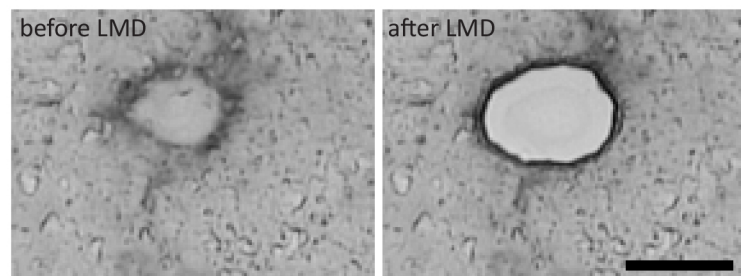

C

| Gene Symbol | Gene Name                                                                                       | Fold enrichment | Cell type |
|-------------|-------------------------------------------------------------------------------------------------|-----------------|-----------|
| PVALB       | parvalbumin                                                                                     | 29.4            | PV        |
| KCNK3       | potassium voltage-gated channel, delayed-rectifier, subfamily S, member 3                       | 16.4            | PV        |
| GAD1        | glutamate decarboxylase 1 (brain, 67kDa)                                                        | 39.3            | GABA      |
| GAD2        | glutamate decarboxylase 2 (pancreatic islets and brain, 65kDa)                                  | 58              | GABA      |
| SLC32A1     | solute carrier family 32 (GABA vesicular transporter), member 1; vGAT1                          | 33.8            | GABA      |
| SLC6A1      | solute carrier family 6 (neurotransmitter transporter, GABA), member 1; GAT1                    | 56.6            | GABA      |
| ERBB4       | v-erb-a erythroblastic leukemia viral oncogene homolog 4 (avian)                                | 91              | PV        |
| SLC17A7     | solute carrier family 17 (sodium-dependent inorganic phosphate cotransporter), member 7; vGLUT1 | 0.1             | PC        |
| NEUROD6     | neuronal differentiation 6                                                                      | 0.05            | PC        |

D

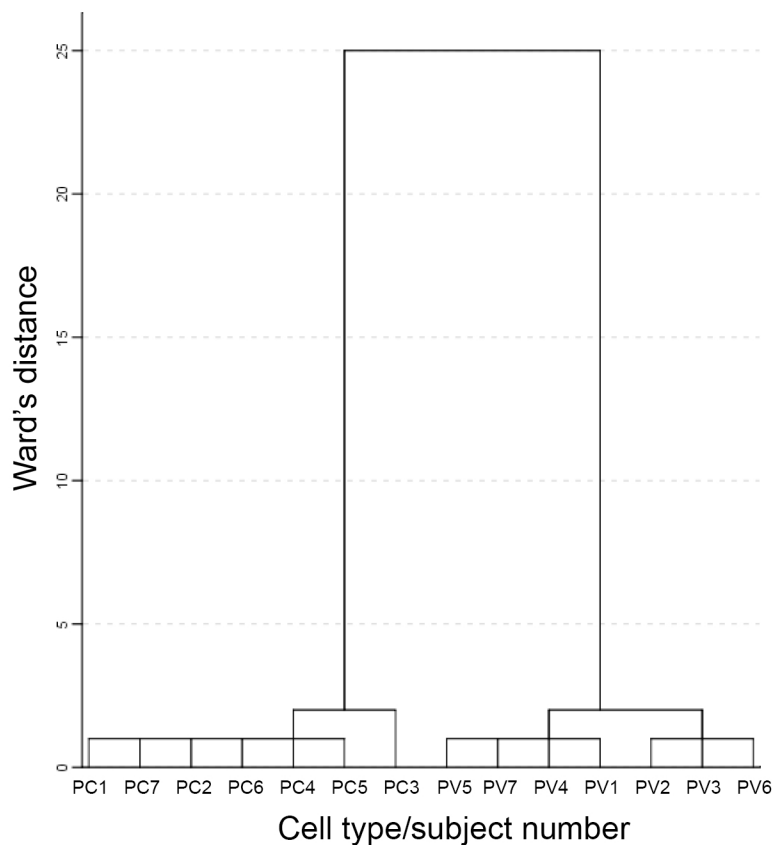

Supplement: NIHMS903243-supplement-2.pdf [file NIHMS903243-supplement-2.pdf]
